# Supplementary material for: The effects of humic substances on DNA isolation from soils
Source: PeerJ. 2020 Jul 24;8:e9378. doi: 10.7717/peerj.9378 (PMC7384437; doi:10.7717/peerj.9378)
Supplement: Supplemental Information 3 [file peerj-08-9378-s003.xls]

## Sheet: 1
		1			Q2/4	Q2/4	Q4/6	ΔA1/ΔA2	LogK	A280/C	A465/C	A665/C	A250/C
	230	0.45476			16.8151	12.443	5.68548	1.81532	0.891213	263.17	21.15	3.72	355.64
	231	0.45081
	232	0.44709
	233	0.44276
	234	0.43794
	235	0.43335
	236	0.42816
	237	0.42301
	238	0.41751
	239	0.41177
	240	0.40637
	241	0.4006
	242	0.39546
	243	0.39019
	244	0.38497
	245	0.37934
	246	0.37389
	247	0.36967
	248	0.36477
	249	0.36027
	250	0.35564
	251	0.35149
	252	0.34764
	253	0.34364
	254	0.34018
	255	0.33692
	256	0.33355
	257	0.33036
	258	0.32761
	259	0.3243
	260	0.32166
	261	0.31864
	262	0.31579
	263	0.31273
	264	0.31024
	265	0.30783
	266	0.3046
	267	0.30162
	268	0.29889
	269	0.29587
	270	0.29301
	271	0.29043
	272	0.28725
	273	0.28417
	274	0.28162
	275	0.27843
	276	0.27513
	277	0.27237
	278	0.26933
	279	0.26624
	280	0.26317
	281	0.26018
	282	0.257
	283	0.25399
	284	0.25113
	285	0.24808
	286	0.24533
	287	0.24212
	288	0.23879
	289	0.23576
	290	0.23242
	291	0.22934
	292	0.22628
	293	0.22331
	294	0.22048
	295	0.21716
	296	0.21401
	297	0.21095
	298	0.20829
	299	0.2054
	300	0.20265
	301	0.20016
	302	0.19732
	303	0.1948
	304	0.19224
	305	0.18933
	306	0.18707
	307	0.18482
	308	0.18241
	309	0.1803
	310	0.17779
	311	0.17591
	312	0.17374
	313	0.17117
	314	0.16926
	315	0.16735
	316	0.16506
	317	0.16352
	318	0.16102
	319	0.15915
	320	0.15719
	321	0.1555
	322	0.15337
	323	0.15153
	324	0.14953
	325	0.1476
	326	0.14544
	327	0.14384
	328	0.14148
	329	0.13967
	330	0.13804
	331	0.1358
	332	0.13417
	333	0.13265
	334	0.13059
	335	0.12876
	336	0.12689
	337	0.12518
	338	0.12338
	339	0.12174
	340	0.1199
	341	0.11824
	342	0.11617
	343	0.11432
	344	0.11263
	345	0.11116
	346	0.10937
	347	0.10764
	348	0.10586
	349	0.1043
	350	0.10264
	351	0.10109
	352	0.09915
	353	0.09791
	354	0.09613
	355	0.09486
	356	0.09336
	357	0.09196
	358	0.09061
	359	0.08893
	360	0.08788
	361	0.08627
	362	0.08491
	363	0.0835
	364	0.08196
	365	0.08085
	366	0.07937
	367	0.07824
	368	0.07711
	369	0.07593
	370	0.07461
	371	0.07344
	372	0.0724
	373	0.07104
	374	0.07011
	375	0.0687
	376	0.06746
	377	0.06632
	378	0.06541
	379	0.06441
	380	0.06337
	381	0.06256
	382	0.06158
	383	0.06051
	384	0.05962
	385	0.05864
	386	0.05766
	387	0.05686
	388	0.05565
	389	0.05499
	390	0.05419
	391	0.05327
	392	0.05258
	393	0.0518
	394	0.05106
	395	0.04992
	396	0.0494
	397	0.04902
	398	0.04837
	399	0.04777
	400	0.04725
	401	0.0466
	402	0.04573
	403	0.04513
	404	0.0444
	405	0.04371
	406	0.04332
	407	0.04258
	408	0.04175
	409	0.04097
	410	0.04058
	411	0.03982
	412	0.03912
	413	0.03854
	414	0.03805
	415	0.03761
	416	0.037
	417	0.03653
	418	0.03605
	419	0.03558
	420	0.03523
	421	0.03453
	422	0.0343
	423	0.03382
	424	0.03329
	425	0.03285
	426	0.03237
	427	0.03202
	428	0.03158
	429	0.03136
	430	0.03093
	431	0.03045
	432	0.03018
	433	0.02971
	434	0.02932
	435	0.02897
	436	0.02863
	437	0.02821
	438	0.02813
	439	0.02783
	440	0.02737
	441	0.02714
	442	0.02679
	443	0.0263
	444	0.02638
	445	0.02598
	446	0.02555
	447	0.02537
	448	0.02519
	449	0.02489
	450	0.02471
	451	0.02452
	452	0.02442
	453	0.02384
	454	0.02352
	455	0.02337
	456	0.02304
	457	0.02295
	458	0.02279
	459	0.02237
	460	0.02216
	461	0.02195
	462	0.02161
	463	0.02157
	464	0.0214
	465	0.02115
	466	0.02077
	467	0.02086
	468	0.02057
	469	0.02024
	470	0.02012
	471	0.01984
	472	0.01952
	473	0.01946
	474	0.01935
	475	0.01903
	476	0.01892
	477	0.01889
	478	0.01868
	479	0.01853
	480	0.01845
	481	0.01817
	482	0.0178
	483	0.01777
	484	0.01745
	485	0.01733
	486	0.01724
	487	0.01707
	488	0.01681
	489	0.01676
	490	0.01659
	491	0.01625
	492	0.01626
	493	0.01592
	494	0.01572
	495	0.01568
	496	0.01548
	497	0.01541
	498	0.01517
	499	0.01505
	500	0.01494
	501	0.01471
	502	0.01431
	503	0.01453
	504	0.01422
	505	0.0142
	506	0.01416
	507	0.01399
	508	0.01395
	509	0.01382
	510	0.01358
	511	0.01349
	512	0.01354
	513	0.01325
	514	0.01313
	515	0.01309
	516	0.01307
	517	0.01281
	518	0.01254
	519	0.01253
	520	0.01218
	521	0.0122
	522	0.01215
	523	0.01205
	524	0.01212
	525	0.01206
	526	0.01194
	527	0.01169
	528	0.01157
	529	0.01148
	530	0.01111
	531	0.01106
	532	0.0111
	533	0.01092
	534	0.01083
	535	0.01087
	536	0.01072
	537	0.01049
	538	0.01059
	539	0.01044
	540	0.01025
	541	0.01022
	542	0.01027
	543	0.01003
	544	0.00992
	545	0.01001
	546	0.00999
	547	0.00969
	548	0.00967
	549	0.0097
	550	0.00939
	551	0.00923
	552	0.00923
	553	0.00906
	554	0.00911
	555	0.00898
	556	0.00883
	557	0.00888
	558	0.00868
	559	0.00852
	560	0.00827
	561	0.00827
	562	0.00818
	563	0.00813
	564	0.00808
	565	0.00799
	566	0.00769
	567	0.00781
	568	0.00776
	569	0.00771
	570	0.00791
	571	0.00766
	572	0.00775
	573	0.00775
	574	0.00742
	575	0.00725
	576	0.00752
	577	0.00733
	578	0.0071
	579	0.0072
	580	0.00713
	581	0.00697
	582	0.00697
	583	0.00718
	584	0.0068
	585	0.00689
	586	0.0068
	587	0.00671
	588	0.00678
	589	0.00665
	590	0.00668
	591	0.00658
	592	0.00639
	593	0.00653
	594	0.00634
	595	0.00627
	596	0.00624
	597	0.00604
	598	0.00613
	599	0.00614
	600	0.00607
	601	0.00599
	602	0.00617
	603	0.00593
	604	0.0056
	605	0.00578
	606	0.00568
	607	0.00537
	608	0.00561
	609	0.00567
	610	0.00553
	611	0.0056
	612	0.00558
	613	0.00552
	614	0.0055
	615	0.00557
	616	0.00522
	617	0.00521
	618	0.00523
	619	0.00492
	620	0.00524
	621	0.00529
	622	0.00509
	623	0.00493
	624	0.00515
	625	0.00499
	626	0.00507
	627	0.00487
	628	0.00495
	629	0.00478
	630	0.00478
	631	0.00475
	632	0.00463
	633	0.00456
	634	0.00444
	635	0.00449
	636	0.00442
	637	0.00443
	638	0.00415
	639	0.0044
	640	0.0045
	641	0.0043
	642	0.00426
	643	0.00402
	644	0.00424
	645	0.00379
	646	0.00402
	647	0.00416
	648	0.00405
	649	0.00398
	650	0.00408
	651	0.00399
	652	0.00393
	653	0.00391
	654	0.0039
	655	0.00388
	656	0.00353
	657	0.00381
	658	0.00379
	659	0.00386
	660	0.00384
	661	0.00392
	662	0.00366
	663	0.00357
	664	0.00356
	665	0.00372
	666	0.00348
	667	0.00374
	668	0.0035
	669	0.00371
	670	0.00351
	671	0.00341
	672	0.00359
	673	0.00352
	674	0.00338
	675	0.0036
	676	0.00319
	677	0.00378
	678	0.00358
	679	0.00339
	680	0.00348
	681	0.00343
	682	0.0035
	683	0.00349
	684	0.00345
	685	0.00352
	686	0.00339
	687	0.00334
	688	0.00366
	689	0.00328
	690	0.00327
	691	0.00356
	692	0.00322
	693	0.00329
	694	0.0032
	695	0.00311
	696	0.00332
	697	0.00329
	698	0.00318
	699	0.00314
	700	0.00361

## Sheet: 2
		2			Q2/4	Q2/4	Q4/6	ΔA1/ΔA2	LogK	A280/C	A465/C	A665/C	A250/C
	230	0.32177			17.3526	12.5727	5.46324	2.06499	0.873933	186.83	14.86	2.72	257.86
	231	0.32011
	232	0.31838
	233	0.31673
	234	0.31406
	235	0.31148
	236	0.30853
	237	0.30506
	238	0.30184
	239	0.29825
	240	0.2943
	241	0.29048
	242	0.28653
	243	0.28305
	244	0.27916
	245	0.27551
	246	0.27143
	247	0.26795
	248	0.26442
	249	0.26106
	250	0.25786
	251	0.2545
	252	0.25184
	253	0.24879
	254	0.24603
	255	0.24342
	256	0.24087
	257	0.23839
	258	0.23625
	259	0.23406
	260	0.23187
	261	0.2295
	262	0.22746
	263	0.2251
	264	0.22301
	265	0.22055
	266	0.2185
	267	0.21594
	268	0.21391
	269	0.21176
	270	0.20955
	271	0.20731
	272	0.20521
	273	0.20262
	274	0.20047
	275	0.19803
	276	0.19563
	277	0.19355
	278	0.19124
	279	0.189
	280	0.18683
	281	0.18497
	282	0.18264
	283	0.1805
	284	0.17831
	285	0.17595
	286	0.17362
	287	0.1716
	288	0.16906
	289	0.16677
	290	0.16489
	291	0.1627
	292	0.16012
	293	0.15785
	294	0.15524
	295	0.15288
	296	0.15077
	297	0.14851
	298	0.14632
	299	0.1444
	300	0.1425
	301	0.1405
	302	0.13872
	303	0.13657
	304	0.13454
	305	0.13247
	306	0.13065
	307	0.12899
	308	0.12724
	309	0.12555
	310	0.12376
	311	0.12193
	312	0.12043
	313	0.11872
	314	0.11723
	315	0.11579
	316	0.11426
	317	0.11274
	318	0.11127
	319	0.10991
	320	0.1086
	321	0.10719
	322	0.10554
	323	0.10399
	324	0.10274
	325	0.10125
	326	0.09955
	327	0.09845
	328	0.0971
	329	0.09571
	330	0.09394
	331	0.09275
	332	0.0916
	333	0.09022
	334	0.08879
	335	0.08786
	336	0.08591
	337	0.08505
	338	0.08399
	339	0.08283
	340	0.08135
	341	0.08012
	342	0.07879
	343	0.07723
	344	0.0762
	345	0.07512
	346	0.07352
	347	0.07258
	348	0.07141
	349	0.07015
	350	0.06931
	351	0.06825
	352	0.06729
	353	0.06581
	354	0.06523
	355	0.06427
	356	0.06319
	357	0.06215
	358	0.06108
	359	0.06014
	360	0.05962
	361	0.05861
	362	0.05764
	363	0.05673
	364	0.05573
	365	0.05468
	366	0.05406
	367	0.05348
	368	0.05259
	369	0.05161
	370	0.05091
	371	0.05019
	372	0.04935
	373	0.04863
	374	0.04797
	375	0.04704
	376	0.04648
	377	0.04552
	378	0.04496
	379	0.04423
	380	0.04363
	381	0.04304
	382	0.0425
	383	0.04165
	384	0.04115
	385	0.04035
	386	0.0398
	387	0.03894
	388	0.03852
	389	0.03776
	390	0.0376
	391	0.03685
	392	0.03631
	393	0.03581
	394	0.03515
	395	0.03474
	396	0.03411
	397	0.03388
	398	0.0336
	399	0.03294
	400	0.03269
	401	0.03232
	402	0.03178
	403	0.03142
	404	0.03109
	405	0.03056
	406	0.03001
	407	0.02937
	408	0.02908
	409	0.02836
	410	0.02816
	411	0.02777
	412	0.02759
	413	0.02711
	414	0.02651
	415	0.0262
	416	0.02599
	417	0.02545
	418	0.02519
	419	0.02498
	420	0.02439
	421	0.024
	422	0.02378
	423	0.02351
	424	0.02299
	425	0.02281
	426	0.02256
	427	0.02221
	428	0.02204
	429	0.02191
	430	0.02152
	431	0.02139
	432	0.02096
	433	0.02062
	434	0.0204
	435	0.02023
	436	0.01998
	437	0.0199
	438	0.01961
	439	0.01932
	440	0.01928
	441	0.01902
	442	0.01883
	443	0.01848
	444	0.01847
	445	0.01825
	446	0.01786
	447	0.01777
	448	0.01772
	449	0.01743
	450	0.01746
	451	0.0171
	452	0.01675
	453	0.0166
	454	0.01633
	455	0.01618
	456	0.0161
	457	0.01597
	458	0.01585
	459	0.01564
	460	0.01556
	461	0.01535
	462	0.01502
	463	0.01506
	464	0.0149
	465	0.01486
	466	0.0147
	467	0.01466
	468	0.01433
	469	0.01425
	470	0.01404
	471	0.01393
	472	0.01366
	473	0.01356
	474	0.01345
	475	0.0133
	476	0.01327
	477	0.01328
	478	0.01258
	479	0.01292
	480	0.01285
	481	0.01265
	482	0.0125
	483	0.01222
	484	0.0121
	485	0.01203
	486	0.01215
	487	0.01177
	488	0.01168
	489	0.01163
	490	0.01154
	491	0.01146
	492	0.01129
	493	0.01121
	494	0.01097
	495	0.01105
	496	0.01077
	497	0.0107
	498	0.01083
	499	0.01051
	500	0.01023
	501	0.01025
	502	0.0101
	503	0.00996
	504	0.00993
	505	0.01007
	506	0.00979
	507	0.00975
	508	0.00975
	509	0.00966
	510	0.00958
	511	0.00929
	512	0.00942
	513	0.00926
	514	0.00922
	515	0.00905
	516	0.00891
	517	0.00898
	518	0.00888
	519	0.00866
	520	0.00852
	521	0.00859
	522	0.00853
	523	0.00856
	524	0.00854
	525	0.00848
	526	0.00832
	527	0.00828
	528	0.0082
	529	0.00791
	530	0.00779
	531	0.0077
	532	0.00765
	533	0.00773
	534	0.0078
	535	0.00771
	536	0.00765
	537	0.00754
	538	0.00756
	539	0.00745
	540	0.00739
	541	0.00727
	542	0.00724
	543	0.00712
	544	0.00705
	545	0.00677
	546	0.00704
	547	0.00686
	548	0.00677
	549	0.00679
	550	0.00678
	551	0.00665
	552	0.00649
	553	0.00661
	554	0.00628
	555	0.00657
	556	0.00642
	557	0.00626
	558	0.00619
	559	0.00616
	560	0.0057
	561	0.00582
	562	0.00569
	563	0.00564
	564	0.00568
	565	0.0055
	566	0.00537
	567	0.00549
	568	0.00548
	569	0.00543
	570	0.00542
	571	0.00538
	572	0.00534
	573	0.00539
	574	0.00514
	575	0.00506
	576	0.00512
	577	0.00497
	578	0.00498
	579	0.00488
	580	0.00514
	581	0.00498
	582	0.00481
	583	0.00514
	584	0.00494
	585	0.00498
	586	0.00489
	587	0.00488
	588	0.005
	589	0.00478
	590	0.00473
	591	0.00475
	592	0.00473
	593	0.0045
	594	0.00447
	595	0.00449
	596	0.00433
	597	0.00418
	598	0.00423
	599	0.00436
	600	0.00437
	601	0.00433
	602	0.00443
	603	0.00423
	604	0.00419
	605	0.00416
	606	0.00419
	607	0.00413
	608	0.00407
	609	0.00414
	610	0.00391
	611	0.00386
	612	0.00396
	613	0.00386
	614	0.00393
	615	0.00408
	616	0.00385
	617	0.00396
	618	0.00399
	619	0.00389
	620	0.00358
	621	0.00388
	622	0.00393
	623	0.00361
	624	0.00374
	625	0.00354
	626	0.00338
	627	0.00354
	628	0.00342
	629	0.00342
	630	0.00358
	631	0.00343
	632	0.00339
	633	0.00344
	634	0.00337
	635	0.00334
	636	0.00314
	637	0.00319
	638	0.00303
	639	0.003
	640	0.00309
	641	0.00306
	642	0.00286
	643	0.00291
	644	0.00292
	645	0.00301
	646	0.00302
	647	0.00296
	648	0.00306
	649	0.00295
	650	0.00305
	651	0.00316
	652	0.00281
	653	0.00288
	654	0.00294
	655	0.0028
	656	0.00262
	657	0.00273
	658	0.00271
	659	0.00274
	660	0.00289
	661	0.00271
	662	0.00279
	663	0.00295
	664	0.00261
	665	0.00272
	666	0.0029
	667	0.00274
	668	0.00283
	669	0.00272
	670	0.00239
	671	0.00254
	672	0.00251
	673	0.00249
	674	0.0025
	675	0.00252
	676	0.00261
	677	0.00258
	678	0.00255
	679	0.00243
	680	0.00269
	681	0.00272
	682	0.00267
	683	0.00279
	684	0.00266
	685	0.00281
	686	0.0026
	687	0.00263
	688	0.00262
	689	0.00282
	690	0.00273
	691	0.00277
	692	0.00267
	693	0.0025
	694	0.00245
	695	0.00261
	696	0.00253
	697	0.0025
	698	0.00263
	699	0.0026
	700	0.00244

## Sheet: 3
		3			Q2/4	Q2/4	Q4/6	ΔA1/ΔA2	LogK	A280/C	A465/C	A665/C	A250/C
	230	0.46349			17.6311	12.9756	7.10035	1.83165	0.974736	266.26	20.52	2.89	361.79
	231	0.45937
	232	0.45505
	233	0.45034
	234	0.44566
	235	0.4407
	236	0.43543
	237	0.42959
	238	0.42432
	239	0.4189
	240	0.41332
	241	0.40805
	242	0.40274
	243	0.3972
	244	0.39171
	245	0.38609
	246	0.38075
	247	0.37546
	248	0.37086
	249	0.36595
	250	0.36179
	251	0.3575
	252	0.35342
	253	0.35006
	254	0.34622
	255	0.34223
	256	0.33924
	257	0.33543
	258	0.33215
	259	0.3293
	260	0.32647
	261	0.32366
	262	0.32038
	263	0.31769
	264	0.31477
	265	0.31187
	266	0.30837
	267	0.30545
	268	0.30246
	269	0.29973
	270	0.29662
	271	0.29378
	272	0.29089
	273	0.28733
	274	0.28447
	275	0.2814
	276	0.27815
	277	0.275
	278	0.27173
	279	0.2692
	280	0.26626
	281	0.26354
	282	0.26033
	283	0.25715
	284	0.25413
	285	0.25113
	286	0.24829
	287	0.24492
	288	0.24144
	289	0.23867
	290	0.23557
	291	0.23253
	292	0.22912
	293	0.22593
	294	0.22282
	295	0.21929
	296	0.21606
	297	0.21293
	298	0.21025
	299	0.20734
	300	0.20452
	301	0.20221
	302	0.19911
	303	0.1964
	304	0.1937
	305	0.19126
	306	0.18887
	307	0.18632
	308	0.18419
	309	0.18208
	310	0.17986
	311	0.17779
	312	0.17526
	313	0.17326
	314	0.17116
	315	0.16902
	316	0.16723
	317	0.16511
	318	0.16346
	319	0.16164
	320	0.15966
	321	0.15768
	322	0.15571
	323	0.15359
	324	0.15163
	325	0.15002
	326	0.14807
	327	0.14602
	328	0.14408
	329	0.14254
	330	0.13969
	331	0.13771
	332	0.1364
	333	0.13395
	334	0.13232
	335	0.1301
	336	0.12866
	337	0.12678
	338	0.12487
	339	0.12338
	340	0.12143
	341	0.11945
	342	0.11764
	343	0.11552
	344	0.11367
	345	0.11188
	346	0.10998
	347	0.1084
	348	0.10678
	349	0.1048
	350	0.10365
	351	0.10169
	352	0.10015
	353	0.09826
	354	0.09733
	355	0.09555
	356	0.09395
	357	0.09235
	358	0.09091
	359	0.08947
	360	0.08813
	361	0.08657
	362	0.08525
	363	0.08418
	364	0.08263
	365	0.08138
	366	0.08
	367	0.07867
	368	0.07749
	369	0.07645
	370	0.07499
	371	0.07372
	372	0.0725
	373	0.07132
	374	0.07034
	375	0.06913
	376	0.06774
	377	0.0666
	378	0.06592
	379	0.06469
	380	0.06388
	381	0.0628
	382	0.06186
	383	0.06083
	384	0.05994
	385	0.05887
	386	0.05775
	387	0.057
	388	0.0562
	389	0.05517
	390	0.05465
	391	0.05354
	392	0.05276
	393	0.05202
	394	0.05088
	395	0.05028
	396	0.04963
	397	0.04902
	398	0.04837
	399	0.04786
	400	0.04708
	401	0.0466
	402	0.04613
	403	0.04487
	404	0.0444
	405	0.04367
	406	0.04292
	407	0.0424
	408	0.04179
	409	0.0411
	410	0.04045
	411	0.03974
	412	0.03916
	413	0.03832
	414	0.03788
	415	0.03752
	416	0.03687
	417	0.03653
	418	0.03596
	419	0.03549
	420	0.0351
	421	0.03457
	422	0.03387
	423	0.03347
	424	0.03286
	425	0.03224
	426	0.03198
	427	0.03167
	428	0.03132
	429	0.03102
	430	0.03071
	431	0.02998
	432	0.02988
	433	0.02924
	434	0.02876
	435	0.02863
	436	0.02837
	437	0.02804
	438	0.0277
	439	0.02728
	440	0.02711
	441	0.02659
	442	0.02657
	443	0.02579
	444	0.02569
	445	0.02534
	446	0.02491
	447	0.02452
	448	0.02464
	449	0.02451
	450	0.02403
	451	0.02376
	452	0.02352
	453	0.02299
	454	0.02263
	455	0.02248
	456	0.0224
	457	0.02202
	458	0.02211
	459	0.02169
	460	0.02161
	461	0.02123
	462	0.02085
	463	0.02047
	464	0.0206
	465	0.02052
	466	0.02031
	467	0.02006
	468	0.0196
	469	0.01944
	470	0.01915
	471	0.01866
	472	0.01864
	473	0.01849
	474	0.01822
	475	0.01823
	476	0.01795
	477	0.01783
	478	0.01759
	479	0.01748
	480	0.01728
	481	0.01695
	482	0.01663
	483	0.0166
	484	0.01631
	485	0.01637
	486	0.01619
	487	0.01581
	488	0.01593
	489	0.0155
	490	0.01541
	491	0.01504
	492	0.015
	493	0.01479
	494	0.01492
	495	0.01476
	496	0.01427
	497	0.01419
	498	0.01425
	499	0.01371
	500	0.01368
	501	0.0137
	502	0.0133
	503	0.01341
	504	0.01313
	505	0.01328
	506	0.01299
	507	0.01278
	508	0.01249
	509	0.01261
	510	0.01257
	511	0.01237
	512	0.01233
	513	0.01212
	514	0.01187
	515	0.01192
	516	0.01186
	517	0.01147
	518	0.01154
	519	0.01136
	520	0.01122
	521	0.01108
	522	0.01106
	523	0.01101
	524	0.01078
	525	0.01089
	526	0.01056
	527	0.01052
	528	0.01057
	529	0.01019
	530	0.01011
	531	0.00994
	532	0.00981
	533	0.00976
	534	0.00979
	535	0.0097
	536	0.00976
	537	0.00949
	538	0.00955
	539	0.00923
	540	0.00921
	541	0.00889
	542	0.00906
	543	0.00899
	544	0.00867
	545	0.00876
	546	0.00891
	547	0.00848
	548	0.0083
	549	0.00841
	550	0.00831
	551	0.00819
	552	0.00815
	553	0.00811
	554	0.0079
	555	0.00798
	556	0.00791
	557	0.00763
	558	0.0076
	559	0.0074
	560	0.00707
	561	0.00727
	562	0.00726
	563	0.00713
	564	0.00708
	565	0.00683
	566	0.00682
	567	0.00681
	568	0.00656
	569	0.00667
	570	0.00671
	571	0.00671
	572	0.00671
	573	0.00667
	574	0.0063
	575	0.00638
	576	0.00627
	577	0.00608
	578	0.00614
	579	0.00612
	580	0.00605
	581	0.0061
	582	0.0061
	583	0.00614
	584	0.00593
	585	0.00593
	586	0.00584
	587	0.00575
	588	0.0057
	589	0.00557
	590	0.00565
	591	0.00562
	592	0.00543
	593	0.00541
	594	0.00555
	595	0.00536
	596	0.0052
	597	0.00513
	598	0.00505
	599	0.00502
	600	0.00499
	601	0.005
	602	0.00496
	603	0.00506
	604	0.00477
	605	0.0047
	606	0.00477
	607	0.00463
	608	0.00449
	609	0.00463
	610	0.00458
	611	0.00448
	612	0.00446
	613	0.00453
	614	0.00443
	615	0.00453
	616	0.00435
	617	0.00425
	618	0.00428
	619	0.0041
	620	0.0042
	621	0.00442
	622	0.0043
	623	0.00427
	624	0.00424
	625	0.00404
	626	0.00379
	627	0.00387
	628	0.00366
	629	0.00383
	630	0.00391
	631	0.0038
	632	0.00385
	633	0.00373
	634	0.00366
	635	0.00371
	636	0.00347
	637	0.00348
	638	0.00336
	639	0.0032
	640	0.00325
	641	0.00326
	642	0.00335
	643	0.0032
	644	0.00329
	645	0.00317
	646	0.00315
	647	0.00325
	648	0.00314
	649	0.00287
	650	0.00317
	651	0.00307
	652	0.00293
	653	0.003
	654	0.00303
	655	0.00301
	656	0.00299
	657	0.00273
	658	0.00275
	659	0.00299
	660	0.00289
	661	0.00271
	662	0.00283
	663	0.00291
	664	0.00257
	665	0.00289
	666	0.00298
	667	0.00282
	668	0.00267
	669	0.00263
	670	0.00277
	671	0.00254
	672	0.00276
	673	0.00236
	674	0.00267
	675	0.00281
	676	0.00253
	677	0.00262
	678	0.00267
	679	0.00243
	680	0.00265
	681	0.00272
	682	0.00255
	683	0.00266
	684	0.00282
	685	0.00273
	686	0.00256
	687	0.00247
	688	0.00246
	689	0.00253
	690	0.00269
	691	0.00264
	692	0.00247
	693	0.00254
	694	0.00245
	695	0.00248
	696	0.00262
	697	0.00263
	698	0.00243
	699	0.00252
	700	0.01113

## Sheet: 4
		4			Q2/4	Q2/4	Q4/6	ΔA1/ΔA2	LogK	A280/C	A465/C	A665/C	A250/C
	230	0.3321			24.2979	16.915	5.00467	2.11566	0.947316	181.16	10.71	2.14	260.23
	231	0.3301
	232	0.32795
	233	0.32548
	234	0.32262
	235	0.31921
	236	0.31584
	237	0.3124
	238	0.30828
	239	0.30426
	240	0.30004
	241	0.29602
	242	0.29166
	243	0.2874
	244	0.28326
	245	0.27921
	246	0.27503
	247	0.27109
	248	0.26719
	249	0.26345
	250	0.26023
	251	0.25685
	252	0.25391
	253	0.25105
	254	0.24835
	255	0.24539
	256	0.24268
	257	0.23999
	258	0.23745
	259	0.23532
	260	0.23306
	261	0.23048
	262	0.22805
	263	0.22582
	264	0.22321
	265	0.22087
	266	0.21792
	267	0.21518
	268	0.2122
	269	0.21018
	270	0.20773
	271	0.20513
	272	0.20253
	273	0.19971
	274	0.19696
	275	0.19441
	276	0.19149
	277	0.18876
	278	0.18636
	279	0.18378
	280	0.18116
	281	0.17903
	282	0.17649
	283	0.17409
	284	0.17164
	285	0.16927
	286	0.1668
	287	0.16412
	288	0.16197
	289	0.15926
	290	0.15707
	291	0.15498
	292	0.15223
	293	0.1496
	294	0.14755
	295	0.14544
	296	0.14299
	297	0.14028
	298	0.13797
	299	0.1362
	300	0.13481
	301	0.13284
	302	0.13078
	303	0.12893
	304	0.12704
	305	0.12485
	306	0.12301
	307	0.12138
	308	0.1195
	309	0.11856
	310	0.11659
	311	0.11505
	312	0.11327
	313	0.11184
	314	0.11052
	315	0.10911
	316	0.1073
	317	0.1055
	318	0.10396
	319	0.10307
	320	0.10198
	321	0.10074
	322	0.09901
	323	0.09724
	324	0.0963
	325	0.09493
	326	0.09365
	327	0.09207
	328	0.09094
	329	0.08957
	330	0.08784
	331	0.08666
	332	0.08515
	333	0.08427
	334	0.08267
	335	0.08126
	336	0.08055
	337	0.07897
	338	0.07798
	339	0.07651
	340	0.07528
	341	0.07374
	342	0.07248
	343	0.07131
	344	0.06997
	345	0.06849
	346	0.06695
	347	0.06626
	348	0.06488
	349	0.06354
	350	0.06267
	351	0.06149
	352	0.06063
	353	0.0595
	354	0.05837
	355	0.05733
	356	0.05631
	357	0.05534
	358	0.05446
	359	0.05358
	360	0.0523
	361	0.05144
	362	0.05063
	363	0.04959
	364	0.04883
	365	0.0482
	366	0.04692
	367	0.04622
	368	0.04534
	369	0.04456
	370	0.04395
	371	0.04316
	372	0.0425
	373	0.04162
	374	0.04105
	375	0.04044
	376	0.03941
	377	0.03886
	378	0.03814
	379	0.03733
	380	0.03678
	381	0.03633
	382	0.03567
	383	0.03518
	384	0.03473
	385	0.03403
	386	0.03331
	387	0.03303
	388	0.03219
	389	0.03169
	390	0.03141
	391	0.0307
	392	0.03043
	393	0.03003
	394	0.02928
	395	0.02871
	396	0.02839
	397	0.02816
	398	0.02781
	399	0.02788
	400	0.02737
	401	0.02722
	402	0.02686
	403	0.02663
	404	0.02618
	405	0.02586
	406	0.02532
	407	0.02478
	408	0.02428
	409	0.02378
	410	0.02349
	411	0.02315
	412	0.02255
	413	0.02216
	414	0.0219
	415	0.02147
	416	0.02093
	417	0.02047
	418	0.02018
	419	0.01955
	420	0.01935
	421	0.01921
	422	0.01878
	423	0.01847
	424	0.01787
	425	0.01782
	426	0.01761
	427	0.01735
	428	0.01701
	429	0.01713
	430	0.01658
	431	0.01628
	432	0.01628
	433	0.01598
	434	0.01593
	435	0.01613
	436	0.01547
	437	0.01522
	438	0.01514
	439	0.0149
	440	0.01457
	441	0.01455
	442	0.01445
	443	0.01407
	444	0.01393
	445	0.0142
	446	0.01407
	447	0.01348
	448	0.0136
	449	0.0131
	450	0.0133
	451	0.01286
	452	0.0128
	453	0.01244
	454	0.01209
	455	0.01231
	456	0.01273
	457	0.01195
	458	0.01186
	459	0.01186
	460	0.01158
	461	0.01145
	462	0.01125
	463	0.01104
	464	0.01096
	465	0.01071
	466	0.01063
	467	0.01076
	468	0.0106
	469	0.01043
	470	0.01027
	471	0.01029
	472	0.01002
	473	0.00975
	474	0.00972
	475	0.00974
	476	0.00963
	477	0.00939
	478	0.00927
	479	0.00953
	480	0.00942
	481	0.00906
	482	0.0089
	483	0.00883
	484	0.00851
	485	0.00856
	486	0.00896
	487	0.00896
	488	0.00841
	489	0.00828
	490	0.00819
	491	0.00807
	492	0.00791
	493	0.00754
	494	0.00754
	495	0.00767
	496	0.00743
	497	0.0076
	498	0.00753
	499	0.00729
	500	0.00738
	501	0.0072
	502	0.00697
	503	0.0069
	504	0.00667
	505	0.00685
	506	0.00686
	507	0.0071
	508	0.00677
	509	0.00665
	510	0.00682
	511	0.00632
	512	0.00633
	513	0.00661
	514	0.00629
	515	0.00608
	516	0.00611
	517	0.00609
	518	0.00616
	519	0.00602
	520	0.006
	521	0.00578
	522	0.00589
	523	0.00571
	524	0.00569
	525	0.00584
	526	0.00556
	527	0.00556
	528	0.00572
	529	0.00523
	530	0.00515
	531	0.00527
	532	0.00522
	533	0.00533
	534	0.00528
	535	0.00511
	536	0.00505
	537	0.00515
	538	0.00504
	539	0.00489
	540	0.00475
	541	0.0048
	542	0.00493
	543	0.00498
	544	0.0049
	545	0.00467
	546	0.00482
	547	0.00464
	548	0.00425
	549	0.00432
	550	0.00463
	551	0.00459
	552	0.0043
	553	0.0043
	554	0.00418
	555	0.0043
	556	0.00427
	557	0.00416
	558	0.00388
	559	0.00368
	560	0.00368
	561	0.00392
	562	0.00371
	563	0.00366
	564	0.00374
	565	0.00369
	566	0.00339
	567	0.00404
	568	0.00334
	569	0.00353
	570	0.00348
	571	0.00357
	572	0.0034
	573	0.00357
	574	0.00345
	575	0.00336
	576	0.00359
	577	0.00356
	578	0.00366
	579	0.00327
	580	0.00337
	581	0.00308
	582	0.00341
	583	0.00333
	584	0.00324
	585	0.00329
	586	0.00324
	587	0.00331
	588	0.00281
	589	0.00309
	590	0.00304
	591	0.00326
	592	0.00312
	593	0.00301
	594	0.00303
	595	0.00317
	596	0.00289
	597	0.00289
	598	0.00282
	599	0.00275
	600	0.00309
	601	0.00285
	602	0.0031
	603	0.00299
	604	0.00287
	605	0.00292
	606	0.00274
	607	0.00256
	608	0.00279
	609	0.00314
	610	0.00296
	611	0.00282
	612	0.00272
	613	0.00283
	614	0.00294
	615	0.00296
	616	0.00274
	617	0.00293
	618	0.00258
	619	0.00302
	620	0.00251
	621	0.0026
	622	0.00244
	623	0.0027
	624	0.00254
	625	0.00267
	626	0.00234
	627	0.00255
	628	0.00243
	629	0.00276
	630	0.00263
	631	0.00248
	632	0.00261
	633	0.00249
	634	0.00238
	635	0.00234
	636	0.00239
	637	0.00207
	638	0.0022
	639	0.00217
	640	0.00206
	641	0.00219
	642	0.00216
	643	0.00204
	644	0.0023
	645	0.00218
	646	0.00224
	647	0.00226
	648	0.00231
	649	0.00204
	650	0.00226
	651	0.00237
	652	0.00231
	653	0.00217
	654	0.00236
	655	0.00222
	656	0.00217
	657	0.00199
	658	0.00213
	659	0.00224
	660	0.00227
	661	0.00218
	662	0.00221
	663	0.00249
	664	0.00203
	665	0.00214
	666	0.00219
	667	0.00191
	668	0.00159
	669	0.00214
	670	0.00198
	671	0.00216
	672	0.00197
	673	0.00195
	674	0.00201
	675	0.00207
	676	0.00216
	677	0.00217
	678	0.00226
	679	0.0021
	680	0.00219
	681	0.00227
	682	0.00205
	683	0.00179
	684	0.00224
	685	0.00211
	686	0.00189
	687	0.00218
	688	0.00242
	689	0.00212
	690	0.00228
	691	0.00194
	692	0.00197
	693	0.00213
	694	0.00216
	695	0.00211
	696	0.00212
	697	0.00213
	698	0.00214
	699	0.00223
	700	0.0024

## Sheet: 5
		5			Q2/4	Q2/4	Q4/6	ΔA1/ΔA2	LogK	A280/C	A465/C	A665/C	A250/C
	230	0.50875			19.8801	14.2609	7.19495	1.7995	1.00806	284.22	19.93	2.77	396.21
	231	0.50427
	232	0.49982
	233	0.49493
	234	0.48961
	235	0.48398
	236	0.47846
	237	0.47255
	238	0.46614
	239	0.46013
	240	0.45375
	241	0.44759
	242	0.4415
	243	0.43569
	244	0.43005
	245	0.42396
	246	0.41756
	247	0.41154
	248	0.40628
	249	0.40108
	250	0.39621
	251	0.39102
	252	0.38701
	253	0.38275
	254	0.37817
	255	0.37417
	256	0.37024
	257	0.36643
	258	0.36274
	259	0.35953
	260	0.35563
	261	0.35221
	262	0.34856
	263	0.3451
	264	0.34167
	265	0.33801
	266	0.33414
	267	0.33014
	268	0.32658
	269	0.3233
	270	0.31946
	271	0.31624
	272	0.31265
	273	0.30923
	274	0.30529
	275	0.30146
	276	0.29784
	277	0.29432
	278	0.29067
	279	0.28728
	280	0.28422
	281	0.28071
	282	0.27716
	283	0.27422
	284	0.2705
	285	0.2671
	286	0.26387
	287	0.2603
	288	0.25698
	289	0.25354
	290	0.25027
	291	0.24678
	292	0.24312
	293	0.23982
	294	0.23635
	295	0.23284
	296	0.22958
	297	0.22614
	298	0.22306
	299	0.22039
	300	0.2178
	301	0.21459
	302	0.21159
	303	0.20886
	304	0.20615
	305	0.20333
	306	0.20081
	307	0.19806
	308	0.19526
	309	0.1934
	310	0.19118
	311	0.18845
	312	0.18598
	313	0.18322
	314	0.18143
	315	0.17905
	316	0.17711
	317	0.17465
	318	0.17272
	319	0.17075
	320	0.16884
	321	0.167
	322	0.16464
	323	0.16258
	324	0.16065
	325	0.15872
	326	0.15645
	327	0.15436
	328	0.15228
	329	0.15109
	330	0.14763
	331	0.1459
	332	0.14384
	333	0.14212
	334	0.13996
	335	0.13815
	336	0.13656
	337	0.13438
	338	0.13254
	339	0.13092
	340	0.12877
	341	0.12671
	342	0.12438
	343	0.12244
	344	0.12062
	345	0.11848
	346	0.11667
	347	0.11465
	348	0.11305
	349	0.1112
	350	0.10957
	351	0.10759
	352	0.10613
	353	0.10416
	354	0.10251
	355	0.10081
	356	0.09914
	357	0.09727
	358	0.09581
	359	0.0945
	360	0.09261
	361	0.09113
	362	0.08955
	363	0.08823
	364	0.08652
	365	0.08516
	366	0.08347
	367	0.08213
	368	0.08075
	369	0.07957
	370	0.07809
	371	0.07681
	372	0.07553
	373	0.07426
	374	0.07313
	375	0.07171
	376	0.07042
	377	0.06908
	378	0.06788
	379	0.06683
	380	0.06573
	381	0.06493
	382	0.06352
	383	0.06254
	384	0.06174
	385	0.06057
	386	0.05958
	387	0.05869
	388	0.05743
	389	0.05677
	390	0.05574
	391	0.05486
	392	0.0538
	393	0.05324
	394	0.05237
	395	0.05122
	396	0.05061
	397	0.04974
	398	0.04927
	399	0.04889
	400	0.04788
	401	0.04741
	402	0.04662
	403	0.04549
	404	0.04502
	405	0.04446
	406	0.04354
	407	0.04275
	408	0.04219
	409	0.04136
	410	0.04071
	411	0.04026
	412	0.0396
	413	0.0388
	414	0.0384
	415	0.03769
	416	0.03717
	417	0.03674
	418	0.03609
	419	0.03553
	420	0.03536
	421	0.03453
	422	0.034
	423	0.03364
	424	0.03294
	425	0.03242
	426	0.03185
	427	0.0315
	428	0.03128
	429	0.03084
	430	0.03058
	431	0.02993
	432	0.0298
	433	0.02928
	434	0.02876
	435	0.02875
	436	0.02825
	437	0.02782
	438	0.02761
	439	0.02719
	440	0.02669
	441	0.02642
	442	0.02598
	443	0.02545
	444	0.02535
	445	0.02496
	446	0.0247
	447	0.02448
	448	0.02422
	449	0.02396
	450	0.02382
	451	0.02342
	452	0.02306
	453	0.0227
	454	0.02229
	455	0.0221
	456	0.02198
	457	0.02147
	458	0.02152
	459	0.02118
	460	0.0211
	461	0.02064
	462	0.02055
	463	0.02013
	464	0.02014
	465	0.01993
	466	0.01968
	467	0.01951
	468	0.01914
	469	0.01893
	470	0.01851
	471	0.01849
	472	0.01809
	473	0.01811
	474	0.01779
	475	0.01756
	476	0.01736
	477	0.01733
	478	0.01721
	479	0.01714
	480	0.01694
	481	0.01641
	482	0.01629
	483	0.01609
	484	0.0159
	485	0.01561
	486	0.01586
	487	0.01552
	488	0.01538
	489	0.01542
	490	0.01516
	491	0.01483
	492	0.01467
	493	0.01433
	494	0.01421
	495	0.01426
	496	0.01393
	497	0.01374
	498	0.01387
	499	0.01351
	500	0.01331
	501	0.0132
	502	0.01297
	503	0.01274
	504	0.01267
	505	0.01236
	506	0.01236
	507	0.01245
	508	0.01232
	509	0.01211
	510	0.01216
	511	0.01174
	512	0.01166
	513	0.01179
	514	0.01125
	515	0.01125
	516	0.01107
	517	0.01101
	518	0.011
	519	0.01103
	520	0.01059
	521	0.01054
	522	0.01044
	523	0.01051
	524	0.01045
	525	0.01048
	526	0.01015
	527	0.01006
	528	0.01007
	529	0.00965
	530	0.00936
	531	0.00944
	532	0.00935
	533	0.00938
	534	0.00929
	535	0.00916
	536	0.00914
	537	0.0092
	538	0.00901
	539	0.0089
	540	0.00879
	541	0.00876
	542	0.00865
	543	0.00849
	544	0.00838
	545	0.0083
	546	0.00841
	547	0.00807
	548	0.00801
	549	0.00795
	550	0.00789
	551	0.00785
	552	0.00781
	553	0.00765
	554	0.00761
	555	0.00753
	556	0.0075
	557	0.00738
	558	0.00727
	559	0.00711
	560	0.00682
	561	0.00673
	562	0.00677
	563	0.00672
	564	0.00671
	565	0.00641
	566	0.00641
	567	0.00636
	568	0.00614
	569	0.00613
	570	0.00629
	571	0.00613
	572	0.00621
	573	0.00601
	574	0.00597
	575	0.00597
	576	0.00598
	577	0.00579
	578	0.00561
	579	0.00579
	580	0.0056
	581	0.00572
	582	0.00556
	583	0.00543
	584	0.00552
	585	0.00573
	586	0.00543
	587	0.00554
	588	0.00541
	589	0.00524
	590	0.0054
	591	0.00537
	592	0.00522
	593	0.00532
	594	0.00513
	595	0.00511
	596	0.00495
	597	0.00496
	598	0.00485
	599	0.00486
	600	0.0047
	601	0.00467
	602	0.00459
	603	0.00477
	604	0.00428
	605	0.00429
	606	0.0041
	607	0.00421
	608	0.00428
	609	0.00434
	610	0.0042
	611	0.00419
	612	0.00417
	613	0.00399
	614	0.00418
	615	0.00429
	616	0.00398
	617	0.00409
	618	0.00407
	619	0.00393
	620	0.00404
	621	0.004
	622	0.00393
	623	0.00406
	624	0.00407
	625	0.00383
	626	0.00366
	627	0.00375
	628	0.0035
	629	0.00371
	630	0.00379
	631	0.00363
	632	0.0036
	633	0.00348
	634	0.00333
	635	0.00346
	636	0.0033
	637	0.00331
	638	0.00332
	639	0.00341
	640	0.00325
	641	0.00318
	642	0.00302
	643	0.00282
	644	0.003
	645	0.00317
	646	0.0029
	647	0.00292
	648	0.00302
	649	0.00278
	650	0.0028
	651	0.00299
	652	0.00273
	653	0.00284
	654	0.00311
	655	0.00276
	656	0.00304
	657	0.00281
	658	0.00292
	659	0.00299
	660	0.00285
	661	0.00305
	662	0.00279
	663	0.00291
	664	0.00269
	665	0.00277
	666	0.00257
	667	0.00253
	668	0.00258
	669	0.00255
	670	0.00248
	671	0.00237
	672	0.00243
	673	0.0024
	674	0.0025
	675	0.00256
	676	0.00249
	677	0.00258
	678	0.0025
	679	0.0026
	680	0.00273
	681	0.00276
	682	0.00271
	683	0.00233
	684	0.00257
	685	0.00273
	686	0.00252
	687	0.00247
	688	0.00246
	689	0.00257
	690	0.00252
	691	0.0026
	692	0.00243
	693	0.00246
	694	0.00233
	695	0.0024
	696	0.00249
	697	0.00263
	698	0.00247
	699	0.00235
	700	0.00257

## Sheet: 6
		6			Q2/4	Q2/4	Q4/6	ΔA1/ΔA2	LogK	A280/C	A465/C	A665/C	A250/C
	230	0.47429			20.2057	14.3573	7.16016	1.72439	1.04496	263.17	18.33	2.56	370.37
	231	0.46997
	232	0.46601
	233	0.46175
	234	0.45696
	235	0.45179
	236	0.44651
	237	0.44117
	238	0.43557
	239	0.43033
	240	0.42473
	241	0.41853
	242	0.4131
	243	0.40733
	244	0.40153
	245	0.39589
	246	0.39006
	247	0.38486
	248	0.37961
	249	0.37506
	250	0.37037
	251	0.36609
	252	0.36158
	253	0.35772
	254	0.35373
	255	0.34976
	256	0.34621
	257	0.34234
	258	0.33901
	259	0.33578
	260	0.33224
	261	0.32899
	262	0.32543
	263	0.32214
	264	0.31847
	265	0.3149
	266	0.31122
	267	0.30726
	268	0.30324
	269	0.30019
	270	0.29693
	271	0.2934
	272	0.28997
	273	0.2865
	274	0.28282
	275	0.27924
	276	0.27587
	277	0.27215
	278	0.26868
	279	0.2661
	280	0.26317
	281	0.26004
	282	0.25665
	283	0.25399
	284	0.25078
	285	0.24787
	286	0.24471
	287	0.24164
	288	0.23852
	289	0.23543
	290	0.23249
	291	0.22967
	292	0.22641
	293	0.22337
	294	0.22003
	295	0.21696
	296	0.21388
	297	0.21063
	298	0.20772
	299	0.20577
	300	0.20327
	301	0.20035
	302	0.19756
	303	0.1948
	304	0.19242
	305	0.18981
	306	0.18713
	307	0.18476
	308	0.18241
	309	0.18054
	310	0.17838
	311	0.17597
	312	0.17374
	313	0.17117
	314	0.1696
	315	0.16769
	316	0.16569
	317	0.16352
	318	0.16147
	319	0.15977
	320	0.15814
	321	0.15617
	322	0.15426
	323	0.15242
	324	0.15042
	325	0.1487
	326	0.14653
	327	0.14465
	328	0.14283
	329	0.14151
	330	0.13887
	331	0.13695
	332	0.13564
	333	0.13351
	334	0.13151
	335	0.12978
	336	0.12812
	337	0.12652
	338	0.12481
	339	0.12291
	340	0.12127
	341	0.11924
	342	0.11769
	343	0.11567
	344	0.11413
	345	0.11224
	346	0.11024
	347	0.10861
	348	0.10698
	349	0.10511
	350	0.1037
	351	0.10215
	352	0.10045
	353	0.09886
	354	0.09758
	355	0.096
	356	0.0943
	357	0.09245
	358	0.0912
	359	0.08966
	360	0.08827
	361	0.08691
	362	0.08559
	363	0.08399
	364	0.08249
	365	0.08128
	366	0.07981
	367	0.07843
	368	0.07711
	369	0.07583
	370	0.07476
	371	0.0732
	372	0.07193
	373	0.07095
	374	0.06954
	375	0.06828
	376	0.0669
	377	0.06595
	378	0.06476
	379	0.06376
	380	0.06272
	381	0.06173
	382	0.06057
	383	0.05973
	384	0.05889
	385	0.05777
	386	0.05652
	387	0.05567
	388	0.05479
	389	0.05386
	390	0.0532
	391	0.0521
	392	0.05118
	393	0.05049
	394	0.04944
	395	0.04826
	396	0.04779
	397	0.04688
	398	0.04668
	399	0.04608
	400	0.04525
	401	0.04474
	402	0.04396
	403	0.04314
	404	0.04245
	405	0.04181
	406	0.04107
	407	0.04025
	408	0.03986
	409	0.03912
	410	0.03852
	411	0.03794
	412	0.03733
	413	0.03675
	414	0.03605
	415	0.03539
	416	0.03505
	417	0.03462
	418	0.03388
	419	0.03341
	420	0.03303
	421	0.03237
	422	0.03214
	423	0.03153
	424	0.03079
	425	0.03048
	426	0.03004
	427	0.02952
	428	0.0293
	429	0.0287
	430	0.02852
	431	0.02813
	432	0.02779
	433	0.02744
	434	0.02709
	435	0.02649
	436	0.02632
	437	0.0262
	438	0.02574
	439	0.02532
	440	0.0249
	441	0.02459
	442	0.02432
	443	0.02396
	444	0.02353
	445	0.02326
	446	0.023
	447	0.02253
	448	0.02252
	449	0.02213
	450	0.02209
	451	0.02177
	452	0.02158
	453	0.02113
	454	0.02082
	455	0.02041
	456	0.02042
	457	0.02004
	458	0.02
	459	0.01971
	460	0.01933
	461	0.01925
	462	0.01904
	463	0.01887
	464	0.01875
	465	0.01833
	466	0.01829
	467	0.01808
	468	0.01763
	469	0.01746
	470	0.01726
	471	0.01715
	472	0.01692
	473	0.01664
	474	0.01645
	475	0.01631
	476	0.01594
	477	0.01586
	478	0.01579
	479	0.01559
	480	0.01573
	481	0.01544
	482	0.015
	483	0.01492
	484	0.01456
	485	0.01453
	486	0.01448
	487	0.01435
	488	0.01392
	489	0.01404
	490	0.01378
	491	0.01337
	492	0.01329
	493	0.01329
	494	0.01304
	495	0.01309
	496	0.01302
	497	0.01273
	498	0.01275
	499	0.01234
	500	0.0121
	501	0.01199
	502	0.0118
	503	0.01166
	504	0.01172
	505	0.01136
	506	0.01132
	507	0.0114
	508	0.01128
	509	0.01112
	510	0.01116
	511	0.01075
	512	0.01071
	513	0.01071
	514	0.01059
	515	0.01042
	516	0.01049
	517	0.01006
	518	0.01013
	519	0.01011
	520	0.00993
	521	0.00946
	522	0.00969
	523	0.00943
	524	0.00933
	525	0.00965
	526	0.00932
	527	0.00919
	528	0.00932
	529	0.00886
	530	0.00878
	531	0.00869
	532	0.00848
	533	0.00855
	534	0.00846
	535	0.00821
	536	0.00827
	537	0.00824
	538	0.00801
	539	0.00803
	540	0.00809
	541	0.00785
	542	0.0079
	543	0.00787
	544	0.00767
	545	0.00756
	546	0.00775
	547	0.00736
	548	0.00751
	549	0.00745
	550	0.00727
	551	0.00694
	552	0.00699
	553	0.00682
	554	0.00686
	555	0.00674
	556	0.00671
	557	0.00676
	558	0.00664
	559	0.00628
	560	0.00608
	561	0.00603
	562	0.00594
	563	0.0061
	564	0.00621
	565	0.00608
	566	0.00574
	567	0.00598
	568	0.00565
	569	0.00568
	570	0.00563
	571	0.00567
	572	0.00563
	573	0.00563
	574	0.00543
	575	0.00535
	576	0.00549
	577	0.00522
	578	0.00527
	579	0.00513
	580	0.00523
	581	0.00498
	582	0.00519
	583	0.0051
	584	0.00506
	585	0.00519
	586	0.00518
	587	0.00513
	588	0.00504
	589	0.00495
	590	0.00469
	591	0.00479
	592	0.00452
	593	0.00458
	594	0.00451
	595	0.00445
	596	0.00425
	597	0.0043
	598	0.00414
	599	0.00423
	600	0.00408
	601	0.00417
	602	0.0043
	603	0.00419
	604	0.00407
	605	0.00408
	606	0.00398
	607	0.00388
	608	0.00399
	609	0.00389
	610	0.00396
	611	0.00377
	612	0.00392
	613	0.00386
	614	0.00385
	615	0.00391
	616	0.00377
	617	0.00376
	618	0.00374
	619	0.0036
	620	0.00358
	621	0.00367
	622	0.00356
	623	0.0034
	624	0.00362
	625	0.0035
	626	0.00325
	627	0.00338
	628	0.00346
	629	0.00338
	630	0.00338
	631	0.00343
	632	0.00331
	633	0.00336
	634	0.00329
	635	0.003
	636	0.00293
	637	0.00286
	638	0.00295
	639	0.00312
	640	0.00292
	641	0.00281
	642	0.00282
	643	0.00278
	644	0.00279
	645	0.00272
	646	0.00273
	647	0.00275
	648	0.00277
	649	0.00266
	650	0.00268
	651	0.00274
	652	0.0026
	653	0.00267
	654	0.00253
	655	0.00272
	656	0.00258
	657	0.00248
	658	0.00247
	659	0.00241
	660	0.00243
	661	0.00242
	662	0.0025
	663	0.00241
	664	0.00232
	665	0.00256
	666	0.0024
	667	0.00245
	668	0.00234
	669	0.00234
	670	0.00248
	671	0.00212
	672	0.00226
	673	0.00203
	674	0.00221
	675	0.00231
	676	0.0022
	677	0.00233
	678	0.00226
	679	0.00218
	680	0.00236
	681	0.00227
	682	0.00217
	683	0.00212
	684	0.00241
	685	0.0024
	686	0.00223
	687	0.00238
	688	0.00221
	689	0.00257
	690	0.00232
	691	0.00223
	692	0.00226
	693	0.00229
	694	0.00224
	695	0.00224
	696	0.00237
	697	0.00217
	698	0.0023
	699	0.00256
	700	0.0024

## Sheet: 7
		7			Q2/4	Q2/4	Q4/6	ΔA1/ΔA2	LogK	A280/C	A465/C	A665/C	A250/C
	230	0.53978			12.8842	9.75479	5.64559	1.56316	0.839195	330.98	33.93	6.01	437.16
	231	0.53672
	232	0.53314
	233	0.52946
	234	0.5249
	235	0.52025
	236	0.51519
	237	0.50955
	238	0.50409
	239	0.49832
	240	0.49225
	241	0.48661
	242	0.48115
	243	0.47495
	244	0.46927
	245	0.46332
	246	0.45756
	247	0.4523
	248	0.4471
	249	0.44205
	250	0.43716
	251	0.43253
	252	0.42824
	253	0.42379
	254	0.4203
	255	0.41602
	256	0.41211
	257	0.40873
	258	0.40508
	259	0.40165
	260	0.39864
	261	0.39537
	262	0.39204
	263	0.38901
	264	0.38562
	265	0.38215
	266	0.37892
	267	0.37525
	268	0.37207
	269	0.36917
	270	0.36539
	271	0.36229
	272	0.35912
	273	0.35543
	274	0.35204
	275	0.34858
	276	0.34482
	277	0.34125
	278	0.33755
	279	0.33471
	280	0.33098
	281	0.32766
	282	0.32388
	283	0.32037
	284	0.31665
	285	0.31312
	286	0.30944
	287	0.30564
	288	0.30203
	289	0.29876
	290	0.29528
	291	0.29173
	292	0.28782
	293	0.28425
	294	0.28048
	295	0.27697
	296	0.27336
	297	0.26963
	298	0.26645
	299	0.26342
	300	0.26078
	301	0.25758
	302	0.25455
	303	0.25161
	304	0.24883
	305	0.24565
	306	0.24322
	307	0.24059
	308	0.23784
	309	0.23531
	310	0.2332
	311	0.23032
	312	0.228
	313	0.22509
	314	0.22293
	315	0.2207
	316	0.2185
	317	0.21605
	318	0.21349
	319	0.2119
	320	0.20993
	321	0.20739
	322	0.20493
	323	0.20268
	324	0.20037
	325	0.1982
	326	0.19553
	327	0.19312
	328	0.19103
	329	0.18955
	330	0.18702
	331	0.18439
	332	0.18275
	333	0.18045
	334	0.17805
	335	0.17601
	336	0.17422
	337	0.17172
	338	0.17018
	339	0.16735
	340	0.16542
	341	0.16323
	342	0.161
	343	0.1586
	344	0.15645
	345	0.1543
	346	0.15233
	347	0.15009
	348	0.14842
	349	0.14614
	350	0.14387
	351	0.14245
	352	0.14031
	353	0.13797
	354	0.13657
	355	0.13419
	356	0.13245
	357	0.13092
	358	0.12876
	359	0.12703
	360	0.12547
	361	0.1234
	362	0.12187
	363	0.12034
	364	0.1185
	365	0.11683
	366	0.11528
	367	0.11333
	368	0.11216
	369	0.11032
	370	0.10858
	371	0.10696
	372	0.10584
	373	0.10407
	374	0.10296
	375	0.10125
	376	0.09977
	377	0.09839
	378	0.09716
	379	0.09564
	380	0.09427
	381	0.09306
	382	0.09155
	383	0.09045
	384	0.08945
	385	0.08796
	386	0.08662
	387	0.08547
	388	0.08408
	389	0.08304
	390	0.08195
	391	0.08068
	392	0.07961
	393	0.07849
	394	0.07718
	395	0.07587
	396	0.07527
	397	0.07419
	398	0.07336
	399	0.07248
	400	0.07161
	401	0.07059
	402	0.06958
	403	0.06856
	404	0.06788
	405	0.06701
	406	0.06571
	407	0.06493
	408	0.06424
	409	0.06323
	410	0.0625
	411	0.06161
	412	0.06073
	413	0.06003
	414	0.05925
	415	0.05832
	416	0.05746
	417	0.05701
	418	0.05597
	419	0.05556
	420	0.05493
	421	0.05389
	422	0.05347
	423	0.05297
	424	0.05197
	425	0.05151
	426	0.05083
	427	0.05007
	428	0.04988
	429	0.04925
	430	0.04858
	431	0.04804
	432	0.04758
	433	0.04709
	434	0.04655
	435	0.04601
	436	0.04531
	437	0.04487
	438	0.04466
	439	0.04387
	440	0.04361
	441	0.04302
	442	0.04248
	443	0.04189
	444	0.04161
	445	0.04107
	446	0.0408
	447	0.04036
	448	0.04009
	449	0.03969
	450	0.03938
	451	0.03887
	452	0.03859
	453	0.03813
	454	0.03749
	455	0.03743
	456	0.03691
	457	0.03656
	458	0.0363
	459	0.03587
	460	0.03565
	461	0.03531
	462	0.03492
	463	0.03436
	464	0.0341
	465	0.03393
	466	0.0335
	467	0.03325
	468	0.03308
	469	0.03248
	470	0.03235
	471	0.03198
	472	0.03136
	473	0.03116
	474	0.03097
	475	0.03073
	476	0.03061
	477	0.03028
	478	0.03007
	479	0.02987
	480	0.02953
	481	0.02924
	482	0.029
	483	0.0288
	484	0.02842
	485	0.02822
	486	0.02796
	487	0.02765
	488	0.02756
	489	0.02721
	490	0.02703
	491	0.02678
	492	0.02627
	493	0.02597
	494	0.02598
	495	0.02564
	496	0.02557
	497	0.02532
	498	0.02512
	499	0.02479
	500	0.0245
	501	0.02418
	502	0.02395
	503	0.02375
	504	0.02352
	505	0.02337
	506	0.02324
	507	0.02299
	508	0.02278
	509	0.02269
	510	0.02244
	511	0.02219
	512	0.02207
	513	0.02173
	514	0.02156
	515	0.02148
	516	0.02121
	517	0.02098
	518	0.02093
	519	0.0207
	520	0.02047
	521	0.02029
	522	0.02015
	523	0.02009
	524	0.01995
	525	0.01993
	526	0.01973
	527	0.01952
	528	0.01944
	529	0.01897
	530	0.01876
	531	0.0185
	532	0.01845
	533	0.01836
	534	0.01831
	535	0.01801
	536	0.01803
	537	0.0178
	538	0.01748
	539	0.01745
	540	0.01718
	541	0.0171
	542	0.0169
	543	0.01692
	544	0.01684
	545	0.01664
	546	0.01654
	547	0.01644
	548	0.01622
	549	0.01616
	550	0.01585
	551	0.01564
	552	0.01552
	553	0.01548
	554	0.01531
	555	0.01519
	556	0.01507
	557	0.01462
	558	0.01455
	559	0.01447
	560	0.01409
	561	0.01379
	562	0.01382
	563	0.01403
	564	0.01398
	565	0.01347
	566	0.01342
	567	0.0132
	568	0.01328
	569	0.01306
	570	0.01322
	571	0.01297
	572	0.0131
	573	0.01302
	574	0.01273
	575	0.01273
	576	0.01258
	577	0.01235
	578	0.01216
	579	0.01243
	580	0.01194
	581	0.01215
	582	0.01203
	583	0.0119
	584	0.01169
	585	0.01191
	586	0.01139
	587	0.01147
	588	0.01142
	589	0.01121
	590	0.0112
	591	0.01117
	592	0.01077
	593	0.01092
	594	0.01089
	595	0.01058
	596	0.01038
	597	0.01047
	598	0.01035
	599	0.0104
	600	0.01037
	601	0.01021
	602	0.01051
	603	0.01036
	604	0.01016
	605	0.01004
	606	0.01019
	607	0.00971
	608	0.00991
	609	0.00985
	610	0.00962
	611	0.00973
	612	0.00959
	613	0.00949
	614	0.00972
	615	0.00953
	616	0.00927
	617	0.00929
	618	0.00957
	619	0.00918
	620	0.00928
	621	0.00933
	622	0.00897
	623	0.00906
	624	0.00915
	625	0.00903
	626	0.00882
	627	0.00887
	628	0.00853
	629	0.00874
	630	0.00861
	631	0.00841
	632	0.00842
	633	0.00852
	634	0.00806
	635	0.00799
	636	0.00783
	637	0.00759
	638	0.0076
	639	0.00761
	640	0.00745
	641	0.00733
	642	0.00718
	643	0.00681
	644	0.00694
	645	0.00699
	646	0.00672
	647	0.00669
	648	0.00679
	649	0.00656
	650	0.0067
	651	0.00673
	652	0.00659
	653	0.0067
	654	0.00664
	655	0.00646
	656	0.00623
	657	0.00634
	658	0.00624
	659	0.00627
	660	0.0063
	661	0.00625
	662	0.0062
	663	0.00627
	664	0.00593
	665	0.00601
	666	0.00597
	667	0.0059
	668	0.00578
	669	0.00588
	670	0.00547
	671	0.00574
	672	0.00559
	673	0.00536
	674	0.00558
	675	0.0056
	676	0.00536
	677	0.00541
	678	0.00537
	679	0.00518
	680	0.00552
	681	0.00543
	682	0.00534
	683	0.00537
	684	0.00536
	685	0.00535
	686	0.00518
	687	0.00496
	688	0.00516
	689	0.0052
	690	0.00544
	691	0.00522
	692	0.00492
	693	0.00504
	694	0.00478
	695	0.00469
	696	0.00503
	697	0.00479
	698	0.00476
	699	0.00498
	700	0.00469

## Sheet: 8
		8			Q2/4	Q2/4	Q4/6	ΔA1/ΔA2	LogK	A280/C	A465/C	A665/C	A250/C
	230	0.25955			19.4844	14.0331	4.98058	1.82071	0.943954	143.98	10.26	2.06	199.91
	231	0.25698
	232	0.25516
	233	0.25354
	234	0.25072
	235	0.24803
	236	0.24559
	237	0.24216
	238	0.23894
	239	0.23567
	240	0.23222
	241	0.22891
	242	0.22556
	243	0.22228
	244	0.21877
	245	0.21541
	246	0.21187
	247	0.20867
	248	0.2058
	249	0.20257
	250	0.19991
	251	0.19748
	252	0.19482
	253	0.19236
	254	0.18997
	255	0.18746
	256	0.18537
	257	0.1831
	258	0.18108
	259	0.17947
	260	0.17752
	261	0.17592
	262	0.17403
	263	0.17243
	264	0.17037
	265	0.1685
	266	0.16671
	267	0.16459
	268	0.16332
	269	0.16166
	270	0.16017
	271	0.15865
	272	0.1568
	273	0.15529
	274	0.1534
	275	0.15168
	276	0.15001
	277	0.14823
	278	0.14685
	279	0.14541
	280	0.14398
	281	0.14229
	282	0.14082
	283	0.13946
	284	0.13784
	285	0.13617
	286	0.13447
	287	0.13246
	288	0.13077
	289	0.12925
	290	0.12774
	291	0.1263
	292	0.12414
	293	0.12287
	294	0.12046
	295	0.1191
	296	0.1171
	297	0.11491
	298	0.11369
	299	0.11232
	300	0.11131
	301	0.10954
	302	0.10803
	303	0.10648
	304	0.10524
	305	0.10375
	306	0.10254
	307	0.1004
	308	0.0993
	309	0.0984
	310	0.09696
	311	0.09559
	312	0.09417
	313	0.09343
	314	0.09226
	315	0.09124
	316	0.09023
	317	0.08889
	318	0.08783
	319	0.08726
	320	0.0864
	321	0.08487
	322	0.08367
	323	0.08277
	324	0.08186
	325	0.08072
	326	0.0792
	327	0.0781
	328	0.07672
	329	0.07651
	330	0.0758
	331	0.07428
	332	0.07347
	333	0.0727
	334	0.07128
	335	0.07019
	336	0.06931
	337	0.06824
	338	0.06695
	339	0.06617
	340	0.06506
	341	0.06378
	342	0.06297
	343	0.06169
	344	0.06065
	345	0.05956
	346	0.05847
	347	0.05706
	348	0.05639
	349	0.05603
	350	0.05467
	351	0.05374
	352	0.05307
	353	0.05214
	354	0.0513
	355	0.05055
	356	0.04963
	357	0.04894
	358	0.0479
	359	0.04712
	360	0.04666
	361	0.04594
	362	0.04509
	363	0.04434
	364	0.0434
	365	0.04305
	366	0.04227
	367	0.04131
	368	0.04066
	369	0.03997
	370	0.03954
	371	0.03898
	372	0.0385
	373	0.03728
	374	0.03698
	375	0.03655
	376	0.03566
	377	0.03515
	378	0.03465
	379	0.03389
	380	0.03361
	381	0.03295
	382	0.03255
	383	0.03219
	384	0.03137
	385	0.03097
	386	0.03056
	387	0.02976
	388	0.02948
	389	0.02864
	390	0.02841
	391	0.02792
	392	0.02756
	393	0.0272
	394	0.02651
	395	0.0259
	396	0.02558
	397	0.02553
	398	0.02521
	399	0.02516
	400	0.02461
	401	0.02425
	402	0.02394
	403	0.02349
	404	0.02288
	405	0.02257
	406	0.02207
	407	0.02157
	408	0.02137
	409	0.02092
	410	0.02076
	411	0.02037
	412	0.02007
	413	0.01981
	414	0.01934
	415	0.01917
	416	0.01871
	417	0.01842
	418	0.01821
	419	0.01809
	420	0.01784
	421	0.01754
	422	0.01728
	423	0.01685
	424	0.01629
	425	0.01628
	426	0.01594
	427	0.01564
	428	0.01572
	429	0.01559
	430	0.01542
	431	0.01528
	432	0.01499
	433	0.01486
	434	0.01464
	435	0.01455
	436	0.01427
	437	0.01419
	438	0.01406
	439	0.01361
	440	0.01345
	441	0.01327
	442	0.01313
	443	0.01295
	444	0.0126
	445	0.01259
	446	0.01242
	447	0.01228
	448	0.01232
	449	0.01206
	450	0.01206
	451	0.01179
	452	0.01172
	453	0.01178
	454	0.01151
	455	0.01136
	456	0.0112
	457	0.01108
	458	0.01116
	459	0.01083
	460	0.01079
	461	0.01063
	462	0.01059
	463	0.01038
	464	0.01034
	465	0.01026
	466	0.01002
	467	0.01014
	468	0.00994
	469	0.00949
	470	0.00945
	471	0.00938
	472	0.00919
	473	0.00905
	474	0.0089
	475	0.00884
	476	0.0088
	477	0.00877
	478	0.00882
	479	0.00879
	480	0.00876
	481	0.0084
	482	0.00824
	483	0.00825
	484	0.00806
	485	0.00798
	486	0.0081
	487	0.0078
	488	0.00804
	489	0.00783
	490	0.0077
	491	0.0075
	492	0.00733
	493	0.00738
	494	0.00729
	495	0.00725
	496	0.00714
	497	0.00715
	498	0.00704
	499	0.00692
	500	0.00677
	501	0.0067
	502	0.00656
	503	0.00649
	504	0.00647
	505	0.00624
	506	0.00616
	507	0.0064
	508	0.00595
	509	0.00632
	510	0.00649
	511	0.00608
	512	0.00596
	513	0.006
	514	0.00571
	515	0.00584
	516	0.00582
	517	0.00564
	518	0.00583
	519	0.00594
	520	0.00572
	521	0.00554
	522	0.00552
	523	0.00551
	524	0.00541
	525	0.00551
	526	0.00535
	527	0.00552
	528	0.00531
	529	0.00507
	530	0.00486
	531	0.00498
	532	0.00489
	533	0.00496
	534	0.00491
	535	0.00478
	536	0.00484
	537	0.0049
	538	0.00475
	539	0.00477
	540	0.0047
	541	0.00434
	542	0.00468
	543	0.00477
	544	0.00458
	545	0.00442
	546	0.00436
	547	0.00418
	548	0.00421
	549	0.00427
	550	0.00426
	551	0.00405
	552	0.00405
	553	0.00426
	554	0.00418
	555	0.00418
	556	0.00411
	557	0.00395
	558	0.00396
	559	0.00364
	560	0.0036
	561	0.00343
	562	0.00334
	563	0.00342
	564	0.00357
	565	0.00348
	566	0.00339
	567	0.00347
	568	0.00325
	569	0.00337
	570	0.00328
	571	0.00353
	572	0.00349
	573	0.00353
	574	0.00324
	575	0.00341
	576	0.00326
	577	0.00311
	578	0.00329
	579	0.00314
	580	0.00308
	581	0.00308
	582	0.00312
	583	0.00304
	584	0.00316
	585	0.00324
	586	0.00303
	587	0.00298
	588	0.0031
	589	0.00288
	590	0.003
	591	0.00297
	592	0.00291
	593	0.00313
	594	0.00298
	595	0.00304
	596	0.0028
	597	0.00277
	598	0.00282
	599	0.00295
	600	0.0028
	601	0.00268
	602	0.00302
	603	0.00282
	604	0.00275
	605	0.00271
	606	0.00257
	607	0.00219
	608	0.00229
	609	0.00244
	610	0.00247
	611	0.00249
	612	0.00293
	613	0.00271
	614	0.00261
	615	0.00243
	616	0.00253
	617	0.00268
	618	0.00283
	619	0.00244
	620	0.00251
	621	0.00289
	622	0.00228
	623	0.00257
	624	0.00242
	625	0.00251
	626	0.00222
	627	0.00238
	628	0.00234
	629	0.00247
	630	0.00247
	631	0.00243
	632	0.00244
	633	0.00229
	634	0.00225
	635	0.00214
	636	0.00215
	637	0.00203
	638	0.00216
	639	0.00234
	640	0.00202
	641	0.00198
	642	0.0022
	643	0.00204
	644	0.00209
	645	0.00202
	646	0.00195
	647	0.00197
	648	0.00215
	649	0.00192
	650	0.00202
	651	0.00217
	652	0.00211
	653	0.00201
	654	0.0022
	655	0.00202
	656	0.00204
	657	0.00215
	658	0.00205
	659	0.00195
	660	0.00218
	661	0.00205
	662	0.00204
	663	0.00208
	664	0.00186
	665	0.00206
	666	0.00203
	667	0.00191
	668	0.00213
	669	0.0021
	670	0.00206
	671	0.002
	672	0.00193
	673	0.00182
	674	0.00201
	675	0.0019
	676	0.00178
	677	0.00221
	678	0.00213
	679	0.00197
	680	0.00207
	681	0.00193
	682	0.00201
	683	0.00221
	684	0.0022
	685	0.00215
	686	0.00223
	687	0.00205
	688	0.002
	689	0.00212
	690	0.00203
	691	0.0021
	692	0.00209
	693	0.00213
	694	0.00212
	695	0.00219
	696	0.0022
	697	0.00209
	698	0.0023
	699	0.00219
	700	0.00224

## Sheet: sum
	1	2	3	4	5	6	7	8
230	0.45476	0.32177	0.46349	0.3321	0.50875	0.47429	0.53978	0.25955
231	0.45081	0.32011	0.45937	0.3301	0.50427	0.46997	0.53672	0.25698
232	0.44709	0.31838	0.45505	0.32795	0.49982	0.46601	0.53314	0.25516
233	0.44276	0.31673	0.45034	0.32548	0.49493	0.46175	0.52946	0.25354
234	0.43794	0.31406	0.44566	0.32262	0.48961	0.45696	0.5249	0.25072
235	0.43335	0.31148	0.4407	0.31921	0.48398	0.45179	0.52025	0.24803
236	0.42816	0.30853	0.43543	0.31584	0.47846	0.44651	0.51519	0.24559
237	0.42301	0.30506	0.42959	0.3124	0.47255	0.44117	0.50955	0.24216
238	0.41751	0.30184	0.42432	0.30828	0.46614	0.43557	0.50409	0.23894
239	0.41177	0.29825	0.4189	0.30426	0.46013	0.43033	0.49832	0.23567
240	0.40637	0.2943	0.41332	0.30004	0.45375	0.42473	0.49225	0.23222
241	0.4006	0.29048	0.40805	0.29602	0.44759	0.41853	0.48661	0.22891
242	0.39546	0.28653	0.40274	0.29166	0.4415	0.4131	0.48115	0.22556
243	0.39019	0.28305	0.3972	0.2874	0.43569	0.40733	0.47495	0.22228
244	0.38497	0.27916	0.39171	0.28326	0.43005	0.40153	0.46927	0.21877
245	0.37934	0.27551	0.38609	0.27921	0.42396	0.39589	0.46332	0.21541
246	0.37389	0.27143	0.38075	0.27503	0.41756	0.39006	0.45756	0.21187
247	0.36967	0.26795	0.37546	0.27109	0.41154	0.38486	0.4523	0.20867
248	0.36477	0.26442	0.37086	0.26719	0.40628	0.37961	0.4471	0.2058
249	0.36027	0.26106	0.36595	0.26345	0.40108	0.37506	0.44205	0.20257
250	0.35564	0.25786	0.36179	0.26023	0.39621	0.37037	0.43716	0.19991
251	0.35149	0.2545	0.3575	0.25685	0.39102	0.36609	0.43253	0.19748
252	0.34764	0.25184	0.35342	0.25391	0.38701	0.36158	0.42824	0.19482
253	0.34364	0.24879	0.35006	0.25105	0.38275	0.35772	0.42379	0.19236
254	0.34018	0.24603	0.34622	0.24835	0.37817	0.35373	0.4203	0.18997
255	0.33692	0.24342	0.34223	0.24539	0.37417	0.34976	0.41602	0.18746
256	0.33355	0.24087	0.33924	0.24268	0.37024	0.34621	0.41211	0.18537
257	0.33036	0.23839	0.33543	0.23999	0.36643	0.34234	0.40873	0.1831
258	0.32761	0.23625	0.33215	0.23745	0.36274	0.33901	0.40508	0.18108
259	0.3243	0.23406	0.3293	0.23532	0.35953	0.33578	0.40165	0.17947
260	0.32166	0.23187	0.32647	0.23306	0.35563	0.33224	0.39864	0.17752
261	0.31864	0.2295	0.32366	0.23048	0.35221	0.32899	0.39537	0.17592
262	0.31579	0.22746	0.32038	0.22805	0.34856	0.32543	0.39204	0.17403
263	0.31273	0.2251	0.31769	0.22582	0.3451	0.32214	0.38901	0.17243
264	0.31024	0.22301	0.31477	0.22321	0.34167	0.31847	0.38562	0.17037
265	0.30783	0.22055	0.31187	0.22087	0.33801	0.3149	0.38215	0.1685
266	0.3046	0.2185	0.30837	0.21792	0.33414	0.31122	0.37892	0.16671
267	0.30162	0.21594	0.30545	0.21518	0.33014	0.30726	0.37525	0.16459
268	0.29889	0.21391	0.30246	0.2122	0.32658	0.30324	0.37207	0.16332
269	0.29587	0.21176	0.29973	0.21018	0.3233	0.30019	0.36917	0.16166
270	0.29301	0.20955	0.29662	0.20773	0.31946	0.29693	0.36539	0.16017
271	0.29043	0.20731	0.29378	0.20513	0.31624	0.2934	0.36229	0.15865
272	0.28725	0.20521	0.29089	0.20253	0.31265	0.28997	0.35912	0.1568
273	0.28417	0.20262	0.28733	0.19971	0.30923	0.2865	0.35543	0.15529
274	0.28162	0.20047	0.28447	0.19696	0.30529	0.28282	0.35204	0.1534
275	0.27843	0.19803	0.2814	0.19441	0.30146	0.27924	0.34858	0.15168
276	0.27513	0.19563	0.27815	0.19149	0.29784	0.27587	0.34482	0.15001
277	0.27237	0.19355	0.275	0.18876	0.29432	0.27215	0.34125	0.14823
278	0.26933	0.19124	0.27173	0.18636	0.29067	0.26868	0.33755	0.14685
279	0.26624	0.189	0.2692	0.18378	0.28728	0.2661	0.33471	0.14541
280	0.26317	0.18683	0.26626	0.18116	0.28422	0.26317	0.33098	0.14398
281	0.26018	0.18497	0.26354	0.17903	0.28071	0.26004	0.32766	0.14229
282	0.257	0.18264	0.26033	0.17649	0.27716	0.25665	0.32388	0.14082
283	0.25399	0.1805	0.25715	0.17409	0.27422	0.25399	0.32037	0.13946
284	0.25113	0.17831	0.25413	0.17164	0.2705	0.25078	0.31665	0.13784
285	0.24808	0.17595	0.25113	0.16927	0.2671	0.24787	0.31312	0.13617
286	0.24533	0.17362	0.24829	0.1668	0.26387	0.24471	0.30944	0.13447
287	0.24212	0.1716	0.24492	0.16412	0.2603	0.24164	0.30564	0.13246
288	0.23879	0.16906	0.24144	0.16197	0.25698	0.23852	0.30203	0.13077
289	0.23576	0.16677	0.23867	0.15926	0.25354	0.23543	0.29876	0.12925
290	0.23242	0.16489	0.23557	0.15707	0.25027	0.23249	0.29528	0.12774
291	0.22934	0.1627	0.23253	0.15498	0.24678	0.22967	0.29173	0.1263
292	0.22628	0.16012	0.22912	0.15223	0.24312	0.22641	0.28782	0.12414
293	0.22331	0.15785	0.22593	0.1496	0.23982	0.22337	0.28425	0.12287
294	0.22048	0.15524	0.22282	0.14755	0.23635	0.22003	0.28048	0.12046
295	0.21716	0.15288	0.21929	0.14544	0.23284	0.21696	0.27697	0.1191
296	0.21401	0.15077	0.21606	0.14299	0.22958	0.21388	0.27336	0.1171
297	0.21095	0.14851	0.21293	0.14028	0.22614	0.21063	0.26963	0.11491
298	0.20829	0.14632	0.21025	0.13797	0.22306	0.20772	0.26645	0.11369
299	0.2054	0.1444	0.20734	0.1362	0.22039	0.20577	0.26342	0.11232
300	0.20265	0.1425	0.20452	0.13481	0.2178	0.20327	0.26078	0.11131
301	0.20016	0.1405	0.20221	0.13284	0.21459	0.20035	0.25758	0.10954
302	0.19732	0.13872	0.19911	0.13078	0.21159	0.19756	0.25455	0.10803
303	0.1948	0.13657	0.1964	0.12893	0.20886	0.1948	0.25161	0.10648
304	0.19224	0.13454	0.1937	0.12704	0.20615	0.19242	0.24883	0.10524
305	0.18933	0.13247	0.19126	0.12485	0.20333	0.18981	0.24565	0.10375
306	0.18707	0.13065	0.18887	0.12301	0.20081	0.18713	0.24322	0.10254
307	0.18482	0.12899	0.18632	0.12138	0.19806	0.18476	0.24059	0.1004
308	0.18241	0.12724	0.18419	0.1195	0.19526	0.18241	0.23784	0.0993
309	0.1803	0.12555	0.18208	0.11856	0.1934	0.18054	0.23531	0.0984
310	0.17779	0.12376	0.17986	0.11659	0.19118	0.17838	0.2332	0.09696
311	0.17591	0.12193	0.17779	0.11505	0.18845	0.17597	0.23032	0.09559
312	0.17374	0.12043	0.17526	0.11327	0.18598	0.17374	0.228	0.09417
313	0.17117	0.11872	0.17326	0.11184	0.18322	0.17117	0.22509	0.09343
314	0.16926	0.11723	0.17116	0.11052	0.18143	0.1696	0.22293	0.09226
315	0.16735	0.11579	0.16902	0.10911	0.17905	0.16769	0.2207	0.09124
316	0.16506	0.11426	0.16723	0.1073	0.17711	0.16569	0.2185	0.09023
317	0.16352	0.11274	0.16511	0.1055	0.17465	0.16352	0.21605	0.08889
318	0.16102	0.11127	0.16346	0.10396	0.17272	0.16147	0.21349	0.08783
319	0.15915	0.10991	0.16164	0.10307	0.17075	0.15977	0.2119	0.08726
320	0.15719	0.1086	0.15966	0.10198	0.16884	0.15814	0.20993	0.0864
321	0.1555	0.10719	0.15768	0.10074	0.167	0.15617	0.20739	0.08487
322	0.15337	0.10554	0.15571	0.09901	0.16464	0.15426	0.20493	0.08367
323	0.15153	0.10399	0.15359	0.09724	0.16258	0.15242	0.20268	0.08277
324	0.14953	0.10274	0.15163	0.0963	0.16065	0.15042	0.20037	0.08186
325	0.1476	0.10125	0.15002	0.09493	0.15872	0.1487	0.1982	0.08072
326	0.14544	0.09955	0.14807	0.09365	0.15645	0.14653	0.19553	0.0792
327	0.14384	0.09845	0.14602	0.09207	0.15436	0.14465	0.19312	0.0781
328	0.14148	0.0971	0.14408	0.09094	0.15228	0.14283	0.19103	0.07672
329	0.13967	0.09571	0.14254	0.08957	0.15109	0.14151	0.18955	0.07651
330	0.13804	0.09394	0.13969	0.08784	0.14763	0.13887	0.18702	0.0758
331	0.1358	0.09275	0.13771	0.08666	0.1459	0.13695	0.18439	0.07428
332	0.13417	0.0916	0.1364	0.08515	0.14384	0.13564	0.18275	0.07347
333	0.13265	0.09022	0.13395	0.08427	0.14212	0.13351	0.18045	0.0727
334	0.13059	0.08879	0.13232	0.08267	0.13996	0.13151	0.17805	0.07128
335	0.12876	0.08786	0.1301	0.08126	0.13815	0.12978	0.17601	0.07019
336	0.12689	0.08591	0.12866	0.08055	0.13656	0.12812	0.17422	0.06931
337	0.12518	0.08505	0.12678	0.07897	0.13438	0.12652	0.17172	0.06824
338	0.12338	0.08399	0.12487	0.07798	0.13254	0.12481	0.17018	0.06695
339	0.12174	0.08283	0.12338	0.07651	0.13092	0.12291	0.16735	0.06617
340	0.1199	0.08135	0.12143	0.07528	0.12877	0.12127	0.16542	0.06506
341	0.11824	0.08012	0.11945	0.07374	0.12671	0.11924	0.16323	0.06378
342	0.11617	0.07879	0.11764	0.07248	0.12438	0.11769	0.161	0.06297
343	0.11432	0.07723	0.11552	0.07131	0.12244	0.11567	0.1586	0.06169
344	0.11263	0.0762	0.11367	0.06997	0.12062	0.11413	0.15645	0.06065
345	0.11116	0.07512	0.11188	0.06849	0.11848	0.11224	0.1543	0.05956
346	0.10937	0.07352	0.10998	0.06695	0.11667	0.11024	0.15233	0.05847
347	0.10764	0.07258	0.1084	0.06626	0.11465	0.10861	0.15009	0.05706
348	0.10586	0.07141	0.10678	0.06488	0.11305	0.10698	0.14842	0.05639
349	0.1043	0.07015	0.1048	0.06354	0.1112	0.10511	0.14614	0.05603
350	0.10264	0.06931	0.10365	0.06267	0.10957	0.1037	0.14387	0.05467
351	0.10109	0.06825	0.10169	0.06149	0.10759	0.10215	0.14245	0.05374
352	0.09915	0.06729	0.10015	0.06063	0.10613	0.10045	0.14031	0.05307
353	0.09791	0.06581	0.09826	0.0595	0.10416	0.09886	0.13797	0.05214
354	0.09613	0.06523	0.09733	0.05837	0.10251	0.09758	0.13657	0.0513
355	0.09486	0.06427	0.09555	0.05733	0.10081	0.096	0.13419	0.05055
356	0.09336	0.06319	0.09395	0.05631	0.09914	0.0943	0.13245	0.04963
357	0.09196	0.06215	0.09235	0.05534	0.09727	0.09245	0.13092	0.04894
358	0.09061	0.06108	0.09091	0.05446	0.09581	0.0912	0.12876	0.0479
359	0.08893	0.06014	0.08947	0.05358	0.0945	0.08966	0.12703	0.04712
360	0.08788	0.05962	0.08813	0.0523	0.09261	0.08827	0.12547	0.04666
361	0.08627	0.05861	0.08657	0.05144	0.09113	0.08691	0.1234	0.04594
362	0.08491	0.05764	0.08525	0.05063	0.08955	0.08559	0.12187	0.04509
363	0.0835	0.05673	0.08418	0.04959	0.08823	0.08399	0.12034	0.04434
364	0.08196	0.05573	0.08263	0.04883	0.08652	0.08249	0.1185	0.0434
365	0.08085	0.05468	0.08138	0.0482	0.08516	0.08128	0.11683	0.04305
366	0.07937	0.05406	0.08	0.04692	0.08347	0.07981	0.11528	0.04227
367	0.07824	0.05348	0.07867	0.04622	0.08213	0.07843	0.11333	0.04131
368	0.07711	0.05259	0.07749	0.04534	0.08075	0.07711	0.11216	0.04066
369	0.07593	0.05161	0.07645	0.04456	0.07957	0.07583	0.11032	0.03997
370	0.07461	0.05091	0.07499	0.04395	0.07809	0.07476	0.10858	0.03954
371	0.07344	0.05019	0.07372	0.04316	0.07681	0.0732	0.10696	0.03898
372	0.0724	0.04935	0.0725	0.0425	0.07553	0.07193	0.10584	0.0385
373	0.07104	0.04863	0.07132	0.04162	0.07426	0.07095	0.10407	0.03728
374	0.07011	0.04797	0.07034	0.04105	0.07313	0.06954	0.10296	0.03698
375	0.0687	0.04704	0.06913	0.04044	0.07171	0.06828	0.10125	0.03655
376	0.06746	0.04648	0.06774	0.03941	0.07042	0.0669	0.09977	0.03566
377	0.06632	0.04552	0.0666	0.03886	0.06908	0.06595	0.09839	0.03515
378	0.06541	0.04496	0.06592	0.03814	0.06788	0.06476	0.09716	0.03465
379	0.06441	0.04423	0.06469	0.03733	0.06683	0.06376	0.09564	0.03389
380	0.06337	0.04363	0.06388	0.03678	0.06573	0.06272	0.09427	0.03361
381	0.06256	0.04304	0.0628	0.03633	0.06493	0.06173	0.09306	0.03295
382	0.06158	0.0425	0.06186	0.03567	0.06352	0.06057	0.09155	0.03255
383	0.06051	0.04165	0.06083	0.03518	0.06254	0.05973	0.09045	0.03219
384	0.05962	0.04115	0.05994	0.03473	0.06174	0.05889	0.08945	0.03137
385	0.05864	0.04035	0.05887	0.03403	0.06057	0.05777	0.08796	0.03097
386	0.05766	0.0398	0.05775	0.03331	0.05958	0.05652	0.08662	0.03056
387	0.05686	0.03894	0.057	0.03303	0.05869	0.05567	0.08547	0.02976
388	0.05565	0.03852	0.0562	0.03219	0.05743	0.05479	0.08408	0.02948
389	0.05499	0.03776	0.05517	0.03169	0.05677	0.05386	0.08304	0.02864
390	0.05419	0.0376	0.05465	0.03141	0.05574	0.0532	0.08195	0.02841
391	0.05327	0.03685	0.05354	0.0307	0.05486	0.0521	0.08068	0.02792
392	0.05258	0.03631	0.05276	0.03043	0.0538	0.05118	0.07961	0.02756
393	0.0518	0.03581	0.05202	0.03003	0.05324	0.05049	0.07849	0.0272
394	0.05106	0.03515	0.05088	0.02928	0.05237	0.04944	0.07718	0.02651
395	0.04992	0.03474	0.05028	0.02871	0.05122	0.04826	0.07587	0.0259
396	0.0494	0.03411	0.04963	0.02839	0.05061	0.04779	0.07527	0.02558
397	0.04902	0.03388	0.04902	0.02816	0.04974	0.04688	0.07419	0.02553
398	0.04837	0.0336	0.04837	0.02781	0.04927	0.04668	0.07336	0.02521
399	0.04777	0.03294	0.04786	0.02788	0.04889	0.04608	0.07248	0.02516
400	0.04725	0.03269	0.04708	0.02737	0.04788	0.04525	0.07161	0.02461
401	0.0466	0.03232	0.0466	0.02722	0.04741	0.04474	0.07059	0.02425
402	0.04573	0.03178	0.04613	0.02686	0.04662	0.04396	0.06958	0.02394
403	0.04513	0.03142	0.04487	0.02663	0.04549	0.04314	0.06856	0.02349
404	0.0444	0.03109	0.0444	0.02618	0.04502	0.04245	0.06788	0.02288
405	0.04371	0.03056	0.04367	0.02586	0.04446	0.04181	0.06701	0.02257
406	0.04332	0.03001	0.04292	0.02532	0.04354	0.04107	0.06571	0.02207
407	0.04258	0.02937	0.0424	0.02478	0.04275	0.04025	0.06493	0.02157
408	0.04175	0.02908	0.04179	0.02428	0.04219	0.03986	0.06424	0.02137
409	0.04097	0.02836	0.0411	0.02378	0.04136	0.03912	0.06323	0.02092
410	0.04058	0.02816	0.04045	0.02349	0.04071	0.03852	0.0625	0.02076
411	0.03982	0.02777	0.03974	0.02315	0.04026	0.03794	0.06161	0.02037
412	0.03912	0.02759	0.03916	0.02255	0.0396	0.03733	0.06073	0.02007
413	0.03854	0.02711	0.03832	0.02216	0.0388	0.03675	0.06003	0.01981
414	0.03805	0.02651	0.03788	0.0219	0.0384	0.03605	0.05925	0.01934
415	0.03761	0.0262	0.03752	0.02147	0.03769	0.03539	0.05832	0.01917
416	0.037	0.02599	0.03687	0.02093	0.03717	0.03505	0.05746	0.01871
417	0.03653	0.02545	0.03653	0.02047	0.03674	0.03462	0.05701	0.01842
418	0.03605	0.02519	0.03596	0.02018	0.03609	0.03388	0.05597	0.01821
419	0.03558	0.02498	0.03549	0.01955	0.03553	0.03341	0.05556	0.01809
420	0.03523	0.02439	0.0351	0.01935	0.03536	0.03303	0.05493	0.01784
421	0.03453	0.024	0.03457	0.01921	0.03453	0.03237	0.05389	0.01754
422	0.0343	0.02378	0.03387	0.01878	0.034	0.03214	0.05347	0.01728
423	0.03382	0.02351	0.03347	0.01847	0.03364	0.03153	0.05297	0.01685
424	0.03329	0.02299	0.03286	0.01787	0.03294	0.03079	0.05197	0.01629
425	0.03285	0.02281	0.03224	0.01782	0.03242	0.03048	0.05151	0.01628
426	0.03237	0.02256	0.03198	0.01761	0.03185	0.03004	0.05083	0.01594
427	0.03202	0.02221	0.03167	0.01735	0.0315	0.02952	0.05007	0.01564
428	0.03158	0.02204	0.03132	0.01701	0.03128	0.0293	0.04988	0.01572
429	0.03136	0.02191	0.03102	0.01713	0.03084	0.0287	0.04925	0.01559
430	0.03093	0.02152	0.03071	0.01658	0.03058	0.02852	0.04858	0.01542
431	0.03045	0.02139	0.02998	0.01628	0.02993	0.02813	0.04804	0.01528
432	0.03018	0.02096	0.02988	0.01628	0.0298	0.02779	0.04758	0.01499
433	0.02971	0.02062	0.02924	0.01598	0.02928	0.02744	0.04709	0.01486
434	0.02932	0.0204	0.02876	0.01593	0.02876	0.02709	0.04655	0.01464
435	0.02897	0.02023	0.02863	0.01613	0.02875	0.02649	0.04601	0.01455
436	0.02863	0.01998	0.02837	0.01547	0.02825	0.02632	0.04531	0.01427
437	0.02821	0.0199	0.02804	0.01522	0.02782	0.0262	0.04487	0.01419
438	0.02813	0.01961	0.0277	0.01514	0.02761	0.02574	0.04466	0.01406
439	0.02783	0.01932	0.02728	0.0149	0.02719	0.02532	0.04387	0.01361
440	0.02737	0.01928	0.02711	0.01457	0.02669	0.0249	0.04361	0.01345
441	0.02714	0.01902	0.02659	0.01455	0.02642	0.02459	0.04302	0.01327
442	0.02679	0.01883	0.02657	0.01445	0.02598	0.02432	0.04248	0.01313
443	0.0263	0.01848	0.02579	0.01407	0.02545	0.02396	0.04189	0.01295
444	0.02638	0.01847	0.02569	0.01393	0.02535	0.02353	0.04161	0.0126
445	0.02598	0.01825	0.02534	0.0142	0.02496	0.02326	0.04107	0.01259
446	0.02555	0.01786	0.02491	0.01407	0.0247	0.023	0.0408	0.01242
447	0.02537	0.01777	0.02452	0.01348	0.02448	0.02253	0.04036	0.01228
448	0.02519	0.01772	0.02464	0.0136	0.02422	0.02252	0.04009	0.01232
449	0.02489	0.01743	0.02451	0.0131	0.02396	0.02213	0.03969	0.01206
450	0.02471	0.01746	0.02403	0.0133	0.02382	0.02209	0.03938	0.01206
451	0.02452	0.0171	0.02376	0.01286	0.02342	0.02177	0.03887	0.01179
452	0.02442	0.01675	0.02352	0.0128	0.02306	0.02158	0.03859	0.01172
453	0.02384	0.0166	0.02299	0.01244	0.0227	0.02113	0.03813	0.01178
454	0.02352	0.01633	0.02263	0.01209	0.02229	0.02082	0.03749	0.01151
455	0.02337	0.01618	0.02248	0.01231	0.0221	0.02041	0.03743	0.01136
456	0.02304	0.0161	0.0224	0.01273	0.02198	0.02042	0.03691	0.0112
457	0.02295	0.01597	0.02202	0.01195	0.02147	0.02004	0.03656	0.01108
458	0.02279	0.01585	0.02211	0.01186	0.02152	0.02	0.0363	0.01116
459	0.02237	0.01564	0.02169	0.01186	0.02118	0.01971	0.03587	0.01083
460	0.02216	0.01556	0.02161	0.01158	0.0211	0.01933	0.03565	0.01079
461	0.02195	0.01535	0.02123	0.01145	0.02064	0.01925	0.03531	0.01063
462	0.02161	0.01502	0.02085	0.01125	0.02055	0.01904	0.03492	0.01059
463	0.02157	0.01506	0.02047	0.01104	0.02013	0.01887	0.03436	0.01038
464	0.0214	0.0149	0.0206	0.01096	0.02014	0.01875	0.0341	0.01034
465	0.02115	0.01486	0.02052	0.01071	0.01993	0.01833	0.03393	0.01026
466	0.02077	0.0147	0.02031	0.01063	0.01968	0.01829	0.0335	0.01002
467	0.02086	0.01466	0.02006	0.01076	0.01951	0.01808	0.03325	0.01014
468	0.02057	0.01433	0.0196	0.0106	0.01914	0.01763	0.03308	0.00994
469	0.02024	0.01425	0.01944	0.01043	0.01893	0.01746	0.03248	0.00949
470	0.02012	0.01404	0.01915	0.01027	0.01851	0.01726	0.03235	0.00945
471	0.01984	0.01393	0.01866	0.01029	0.01849	0.01715	0.03198	0.00938
472	0.01952	0.01366	0.01864	0.01002	0.01809	0.01692	0.03136	0.00919
473	0.01946	0.01356	0.01849	0.00975	0.01811	0.01664	0.03116	0.00905
474	0.01935	0.01345	0.01822	0.00972	0.01779	0.01645	0.03097	0.0089
475	0.01903	0.0133	0.01823	0.00974	0.01756	0.01631	0.03073	0.00884
476	0.01892	0.01327	0.01795	0.00963	0.01736	0.01594	0.03061	0.0088
477	0.01889	0.01328	0.01783	0.00939	0.01733	0.01586	0.03028	0.00877
478	0.01868	0.01258	0.01759	0.00927	0.01721	0.01579	0.03007	0.00882
479	0.01853	0.01292	0.01748	0.00953	0.01714	0.01559	0.02987	0.00879
480	0.01845	0.01285	0.01728	0.00942	0.01694	0.01573	0.02953	0.00876
481	0.01817	0.01265	0.01695	0.00906	0.01641	0.01544	0.02924	0.0084
482	0.0178	0.0125	0.01663	0.0089	0.01629	0.015	0.029	0.00824
483	0.01777	0.01222	0.0166	0.00883	0.01609	0.01492	0.0288	0.00825
484	0.01745	0.0121	0.01631	0.00851	0.0159	0.01456	0.02842	0.00806
485	0.01733	0.01203	0.01637	0.00856	0.01561	0.01453	0.02822	0.00798
486	0.01724	0.01215	0.01619	0.00896	0.01586	0.01448	0.02796	0.0081
487	0.01707	0.01177	0.01581	0.00896	0.01552	0.01435	0.02765	0.0078
488	0.01681	0.01168	0.01593	0.00841	0.01538	0.01392	0.02756	0.00804
489	0.01676	0.01163	0.0155	0.00828	0.01542	0.01404	0.02721	0.00783
490	0.01659	0.01154	0.01541	0.00819	0.01516	0.01378	0.02703	0.0077
491	0.01625	0.01146	0.01504	0.00807	0.01483	0.01337	0.02678	0.0075
492	0.01626	0.01129	0.015	0.00791	0.01467	0.01329	0.02627	0.00733
493	0.01592	0.01121	0.01479	0.00754	0.01433	0.01329	0.02597	0.00738
494	0.01572	0.01097	0.01492	0.00754	0.01421	0.01304	0.02598	0.00729
495	0.01568	0.01105	0.01476	0.00767	0.01426	0.01309	0.02564	0.00725
496	0.01548	0.01077	0.01427	0.00743	0.01393	0.01302	0.02557	0.00714
497	0.01541	0.0107	0.01419	0.0076	0.01374	0.01273	0.02532	0.00715
498	0.01517	0.01083	0.01425	0.00753	0.01387	0.01275	0.02512	0.00704
499	0.01505	0.01051	0.01371	0.00729	0.01351	0.01234	0.02479	0.00692
500	0.01494	0.01023	0.01368	0.00738	0.01331	0.0121	0.0245	0.00677
501	0.01471	0.01025	0.0137	0.0072	0.0132	0.01199	0.02418	0.0067
502	0.01431	0.0101	0.0133	0.00697	0.01297	0.0118	0.02395	0.00656
503	0.01453	0.00996	0.01341	0.0069	0.01274	0.01166	0.02375	0.00649
504	0.01422	0.00993	0.01313	0.00667	0.01267	0.01172	0.02352	0.00647
505	0.0142	0.01007	0.01328	0.00685	0.01236	0.01136	0.02337	0.00624
506	0.01416	0.00979	0.01299	0.00686	0.01236	0.01132	0.02324	0.00616
507	0.01399	0.00975	0.01278	0.0071	0.01245	0.0114	0.02299	0.0064
508	0.01395	0.00975	0.01249	0.00677	0.01232	0.01128	0.02278	0.00595
509	0.01382	0.00966	0.01261	0.00665	0.01211	0.01112	0.02269	0.00632
510	0.01358	0.00958	0.01257	0.00682	0.01216	0.01116	0.02244	0.00649
511	0.01349	0.00929	0.01237	0.00632	0.01174	0.01075	0.02219	0.00608
512	0.01354	0.00942	0.01233	0.00633	0.01166	0.01071	0.02207	0.00596
513	0.01325	0.00926	0.01212	0.00661	0.01179	0.01071	0.02173	0.006
514	0.01313	0.00922	0.01187	0.00629	0.01125	0.01059	0.02156	0.00571
515	0.01309	0.00905	0.01192	0.00608	0.01125	0.01042	0.02148	0.00584
516	0.01307	0.00891	0.01186	0.00611	0.01107	0.01049	0.02121	0.00582
517	0.01281	0.00898	0.01147	0.00609	0.01101	0.01006	0.02098	0.00564
518	0.01254	0.00888	0.01154	0.00616	0.011	0.01013	0.02093	0.00583
519	0.01253	0.00866	0.01136	0.00602	0.01103	0.01011	0.0207	0.00594
520	0.01218	0.00852	0.01122	0.006	0.01059	0.00993	0.02047	0.00572
521	0.0122	0.00859	0.01108	0.00578	0.01054	0.00946	0.02029	0.00554
522	0.01215	0.00853	0.01106	0.00589	0.01044	0.00969	0.02015	0.00552
523	0.01205	0.00856	0.01101	0.00571	0.01051	0.00943	0.02009	0.00551
524	0.01212	0.00854	0.01078	0.00569	0.01045	0.00933	0.01995	0.00541
525	0.01206	0.00848	0.01089	0.00584	0.01048	0.00965	0.01993	0.00551
526	0.01194	0.00832	0.01056	0.00556	0.01015	0.00932	0.01973	0.00535
527	0.01169	0.00828	0.01052	0.00556	0.01006	0.00919	0.01952	0.00552
528	0.01157	0.0082	0.01057	0.00572	0.01007	0.00932	0.01944	0.00531
529	0.01148	0.00791	0.01019	0.00523	0.00965	0.00886	0.01897	0.00507
530	0.01111	0.00779	0.01011	0.00515	0.00936	0.00878	0.01876	0.00486
531	0.01106	0.0077	0.00994	0.00527	0.00944	0.00869	0.0185	0.00498
532	0.0111	0.00765	0.00981	0.00522	0.00935	0.00848	0.01845	0.00489
533	0.01092	0.00773	0.00976	0.00533	0.00938	0.00855	0.01836	0.00496
534	0.01083	0.0078	0.00979	0.00528	0.00929	0.00846	0.01831	0.00491
535	0.01087	0.00771	0.0097	0.00511	0.00916	0.00821	0.01801	0.00478
536	0.01072	0.00765	0.00976	0.00505	0.00914	0.00827	0.01803	0.00484
537	0.01049	0.00754	0.00949	0.00515	0.0092	0.00824	0.0178	0.0049
538	0.01059	0.00756	0.00955	0.00504	0.00901	0.00801	0.01748	0.00475
539	0.01044	0.00745	0.00923	0.00489	0.0089	0.00803	0.01745	0.00477
540	0.01025	0.00739	0.00921	0.00475	0.00879	0.00809	0.01718	0.0047
541	0.01022	0.00727	0.00889	0.0048	0.00876	0.00785	0.0171	0.00434
542	0.01027	0.00724	0.00906	0.00493	0.00865	0.0079	0.0169	0.00468
543	0.01003	0.00712	0.00899	0.00498	0.00849	0.00787	0.01692	0.00477
544	0.00992	0.00705	0.00867	0.0049	0.00838	0.00767	0.01684	0.00458
545	0.01001	0.00677	0.00876	0.00467	0.0083	0.00756	0.01664	0.00442
546	0.00999	0.00704	0.00891	0.00482	0.00841	0.00775	0.01654	0.00436
547	0.00969	0.00686	0.00848	0.00464	0.00807	0.00736	0.01644	0.00418
548	0.00967	0.00677	0.0083	0.00425	0.00801	0.00751	0.01622	0.00421
549	0.0097	0.00679	0.00841	0.00432	0.00795	0.00745	0.01616	0.00427
550	0.00939	0.00678	0.00831	0.00463	0.00789	0.00727	0.01585	0.00426
551	0.00923	0.00665	0.00819	0.00459	0.00785	0.00694	0.01564	0.00405
552	0.00923	0.00649	0.00815	0.0043	0.00781	0.00699	0.01552	0.00405
553	0.00906	0.00661	0.00811	0.0043	0.00765	0.00682	0.01548	0.00426
554	0.00911	0.00628	0.0079	0.00418	0.00761	0.00686	0.01531	0.00418
555	0.00898	0.00657	0.00798	0.0043	0.00753	0.00674	0.01519	0.00418
556	0.00883	0.00642	0.00791	0.00427	0.0075	0.00671	0.01507	0.00411
557	0.00888	0.00626	0.00763	0.00416	0.00738	0.00676	0.01462	0.00395
558	0.00868	0.00619	0.0076	0.00388	0.00727	0.00664	0.01455	0.00396
559	0.00852	0.00616	0.0074	0.00368	0.00711	0.00628	0.01447	0.00364
560	0.00827	0.0057	0.00707	0.00368	0.00682	0.00608	0.01409	0.0036
561	0.00827	0.00582	0.00727	0.00392	0.00673	0.00603	0.01379	0.00343
562	0.00818	0.00569	0.00726	0.00371	0.00677	0.00594	0.01382	0.00334
563	0.00813	0.00564	0.00713	0.00366	0.00672	0.0061	0.01403	0.00342
564	0.00808	0.00568	0.00708	0.00374	0.00671	0.00621	0.01398	0.00357
565	0.00799	0.0055	0.00683	0.00369	0.00641	0.00608	0.01347	0.00348
566	0.00769	0.00537	0.00682	0.00339	0.00641	0.00574	0.01342	0.00339
567	0.00781	0.00549	0.00681	0.00404	0.00636	0.00598	0.0132	0.00347
568	0.00776	0.00548	0.00656	0.00334	0.00614	0.00565	0.01328	0.00325
569	0.00771	0.00543	0.00667	0.00353	0.00613	0.00568	0.01306	0.00337
570	0.00791	0.00542	0.00671	0.00348	0.00629	0.00563	0.01322	0.00328
571	0.00766	0.00538	0.00671	0.00357	0.00613	0.00567	0.01297	0.00353
572	0.00775	0.00534	0.00671	0.0034	0.00621	0.00563	0.0131	0.00349
573	0.00775	0.00539	0.00667	0.00357	0.00601	0.00563	0.01302	0.00353
574	0.00742	0.00514	0.0063	0.00345	0.00597	0.00543	0.01273	0.00324
575	0.00725	0.00506	0.00638	0.00336	0.00597	0.00535	0.01273	0.00341
576	0.00752	0.00512	0.00627	0.00359	0.00598	0.00549	0.01258	0.00326
577	0.00733	0.00497	0.00608	0.00356	0.00579	0.00522	0.01235	0.00311
578	0.0071	0.00498	0.00614	0.00366	0.00561	0.00527	0.01216	0.00329
579	0.0072	0.00488	0.00612	0.00327	0.00579	0.00513	0.01243	0.00314
580	0.00713	0.00514	0.00605	0.00337	0.0056	0.00523	0.01194	0.00308
581	0.00697	0.00498	0.0061	0.00308	0.00572	0.00498	0.01215	0.00308
582	0.00697	0.00481	0.0061	0.00341	0.00556	0.00519	0.01203	0.00312
583	0.00718	0.00514	0.00614	0.00333	0.00543	0.0051	0.0119	0.00304
584	0.0068	0.00494	0.00593	0.00324	0.00552	0.00506	0.01169	0.00316
585	0.00689	0.00498	0.00593	0.00329	0.00573	0.00519	0.01191	0.00324
586	0.0068	0.00489	0.00584	0.00324	0.00543	0.00518	0.01139	0.00303
587	0.00671	0.00488	0.00575	0.00331	0.00554	0.00513	0.01147	0.00298
588	0.00678	0.005	0.0057	0.00281	0.00541	0.00504	0.01142	0.0031
589	0.00665	0.00478	0.00557	0.00309	0.00524	0.00495	0.01121	0.00288
590	0.00668	0.00473	0.00565	0.00304	0.0054	0.00469	0.0112	0.003
591	0.00658	0.00475	0.00562	0.00326	0.00537	0.00479	0.01117	0.00297
592	0.00639	0.00473	0.00543	0.00312	0.00522	0.00452	0.01077	0.00291
593	0.00653	0.0045	0.00541	0.00301	0.00532	0.00458	0.01092	0.00313
594	0.00634	0.00447	0.00555	0.00303	0.00513	0.00451	0.01089	0.00298
595	0.00627	0.00449	0.00536	0.00317	0.00511	0.00445	0.01058	0.00304
596	0.00624	0.00433	0.0052	0.00289	0.00495	0.00425	0.01038	0.0028
597	0.00604	0.00418	0.00513	0.00289	0.00496	0.0043	0.01047	0.00277
598	0.00613	0.00423	0.00505	0.00282	0.00485	0.00414	0.01035	0.00282
599	0.00614	0.00436	0.00502	0.00275	0.00486	0.00423	0.0104	0.00295
600	0.00607	0.00437	0.00499	0.00309	0.0047	0.00408	0.01037	0.0028
601	0.00599	0.00433	0.005	0.00285	0.00467	0.00417	0.01021	0.00268
602	0.00617	0.00443	0.00496	0.0031	0.00459	0.0043	0.01051	0.00302
603	0.00593	0.00423	0.00506	0.00299	0.00477	0.00419	0.01036	0.00282
604	0.0056	0.00419	0.00477	0.00287	0.00428	0.00407	0.01016	0.00275
605	0.00578	0.00416	0.0047	0.00292	0.00429	0.00408	0.01004	0.00271
606	0.00568	0.00419	0.00477	0.00274	0.0041	0.00398	0.01019	0.00257
607	0.00537	0.00413	0.00463	0.00256	0.00421	0.00388	0.00971	0.00219
608	0.00561	0.00407	0.00449	0.00279	0.00428	0.00399	0.00991	0.00229
609	0.00567	0.00414	0.00463	0.00314	0.00434	0.00389	0.00985	0.00244
610	0.00553	0.00391	0.00458	0.00296	0.0042	0.00396	0.00962	0.00247
611	0.0056	0.00386	0.00448	0.00282	0.00419	0.00377	0.00973	0.00249
612	0.00558	0.00396	0.00446	0.00272	0.00417	0.00392	0.00959	0.00293
613	0.00552	0.00386	0.00453	0.00283	0.00399	0.00386	0.00949	0.00271
614	0.0055	0.00393	0.00443	0.00294	0.00418	0.00385	0.00972	0.00261
615	0.00557	0.00408	0.00453	0.00296	0.00429	0.00391	0.00953	0.00243
616	0.00522	0.00385	0.00435	0.00274	0.00398	0.00377	0.00927	0.00253
617	0.00521	0.00396	0.00425	0.00293	0.00409	0.00376	0.00929	0.00268
618	0.00523	0.00399	0.00428	0.00258	0.00407	0.00374	0.00957	0.00283
619	0.00492	0.00389	0.0041	0.00302	0.00393	0.0036	0.00918	0.00244
620	0.00524	0.00358	0.0042	0.00251	0.00404	0.00358	0.00928	0.00251
621	0.00529	0.00388	0.00442	0.0026	0.004	0.00367	0.00933	0.00289
622	0.00509	0.00393	0.0043	0.00244	0.00393	0.00356	0.00897	0.00228
623	0.00493	0.00361	0.00427	0.0027	0.00406	0.0034	0.00906	0.00257
624	0.00515	0.00374	0.00424	0.00254	0.00407	0.00362	0.00915	0.00242
625	0.00499	0.00354	0.00404	0.00267	0.00383	0.0035	0.00903	0.00251
626	0.00507	0.00338	0.00379	0.00234	0.00366	0.00325	0.00882	0.00222
627	0.00487	0.00354	0.00387	0.00255	0.00375	0.00338	0.00887	0.00238
628	0.00495	0.00342	0.00366	0.00243	0.0035	0.00346	0.00853	0.00234
629	0.00478	0.00342	0.00383	0.00276	0.00371	0.00338	0.00874	0.00247
630	0.00478	0.00358	0.00391	0.00263	0.00379	0.00338	0.00861	0.00247
631	0.00475	0.00343	0.0038	0.00248	0.00363	0.00343	0.00841	0.00243
632	0.00463	0.00339	0.00385	0.00261	0.0036	0.00331	0.00842	0.00244
633	0.00456	0.00344	0.00373	0.00249	0.00348	0.00336	0.00852	0.00229
634	0.00444	0.00337	0.00366	0.00238	0.00333	0.00329	0.00806	0.00225
635	0.00449	0.00334	0.00371	0.00234	0.00346	0.003	0.00799	0.00214
636	0.00442	0.00314	0.00347	0.00239	0.0033	0.00293	0.00783	0.00215
637	0.00443	0.00319	0.00348	0.00207	0.00331	0.00286	0.00759	0.00203
638	0.00415	0.00303	0.00336	0.0022	0.00332	0.00295	0.0076	0.00216
639	0.0044	0.003	0.0032	0.00217	0.00341	0.00312	0.00761	0.00234
640	0.0045	0.00309	0.00325	0.00206	0.00325	0.00292	0.00745	0.00202
641	0.0043	0.00306	0.00326	0.00219	0.00318	0.00281	0.00733	0.00198
642	0.00426	0.00286	0.00335	0.00216	0.00302	0.00282	0.00718	0.0022
643	0.00402	0.00291	0.0032	0.00204	0.00282	0.00278	0.00681	0.00204
644	0.00424	0.00292	0.00329	0.0023	0.003	0.00279	0.00694	0.00209
645	0.00379	0.00301	0.00317	0.00218	0.00317	0.00272	0.00699	0.00202
646	0.00402	0.00302	0.00315	0.00224	0.0029	0.00273	0.00672	0.00195
647	0.00416	0.00296	0.00325	0.00226	0.00292	0.00275	0.00669	0.00197
648	0.00405	0.00306	0.00314	0.00231	0.00302	0.00277	0.00679	0.00215
649	0.00398	0.00295	0.00287	0.00204	0.00278	0.00266	0.00656	0.00192
650	0.00408	0.00305	0.00317	0.00226	0.0028	0.00268	0.0067	0.00202
651	0.00399	0.00316	0.00307	0.00237	0.00299	0.00274	0.00673	0.00217
652	0.00393	0.00281	0.00293	0.00231	0.00273	0.0026	0.00659	0.00211
653	0.00391	0.00288	0.003	0.00217	0.00284	0.00267	0.0067	0.00201
654	0.0039	0.00294	0.00303	0.00236	0.00311	0.00253	0.00664	0.0022
655	0.00388	0.0028	0.00301	0.00222	0.00276	0.00272	0.00646	0.00202
656	0.00353	0.00262	0.00299	0.00217	0.00304	0.00258	0.00623	0.00204
657	0.00381	0.00273	0.00273	0.00199	0.00281	0.00248	0.00634	0.00215
658	0.00379	0.00271	0.00275	0.00213	0.00292	0.00247	0.00624	0.00205
659	0.00386	0.00274	0.00299	0.00224	0.00299	0.00241	0.00627	0.00195
660	0.00384	0.00289	0.00289	0.00227	0.00285	0.00243	0.0063	0.00218
661	0.00392	0.00271	0.00271	0.00218	0.00305	0.00242	0.00625	0.00205
662	0.00366	0.00279	0.00283	0.00221	0.00279	0.0025	0.0062	0.00204
663	0.00357	0.00295	0.00291	0.00249	0.00291	0.00241	0.00627	0.00208
664	0.00356	0.00261	0.00257	0.00203	0.00269	0.00232	0.00593	0.00186
665	0.00372	0.00272	0.00289	0.00214	0.00277	0.00256	0.00601	0.00206
666	0.00348	0.0029	0.00298	0.00219	0.00257	0.0024	0.00597	0.00203
667	0.00374	0.00274	0.00282	0.00191	0.00253	0.00245	0.0059	0.00191
668	0.0035	0.00283	0.00267	0.00159	0.00258	0.00234	0.00578	0.00213
669	0.00371	0.00272	0.00263	0.00214	0.00255	0.00234	0.00588	0.0021
670	0.00351	0.00239	0.00277	0.00198	0.00248	0.00248	0.00547	0.00206
671	0.00341	0.00254	0.00254	0.00216	0.00237	0.00212	0.00574	0.002
672	0.00359	0.00251	0.00276	0.00197	0.00243	0.00226	0.00559	0.00193
673	0.00352	0.00249	0.00236	0.00195	0.0024	0.00203	0.00536	0.00182
674	0.00338	0.0025	0.00267	0.00201	0.0025	0.00221	0.00558	0.00201
675	0.0036	0.00252	0.00281	0.00207	0.00256	0.00231	0.0056	0.0019
676	0.00319	0.00261	0.00253	0.00216	0.00249	0.0022	0.00536	0.00178
677	0.00378	0.00258	0.00262	0.00217	0.00258	0.00233	0.00541	0.00221
678	0.00358	0.00255	0.00267	0.00226	0.0025	0.00226	0.00537	0.00213
679	0.00339	0.00243	0.00243	0.0021	0.0026	0.00218	0.00518	0.00197
680	0.00348	0.00269	0.00265	0.00219	0.00273	0.00236	0.00552	0.00207
681	0.00343	0.00272	0.00272	0.00227	0.00276	0.00227	0.00543	0.00193
682	0.0035	0.00267	0.00255	0.00205	0.00271	0.00217	0.00534	0.00201
683	0.00349	0.00279	0.00266	0.00179	0.00233	0.00212	0.00537	0.00221
684	0.00345	0.00266	0.00282	0.00224	0.00257	0.00241	0.00536	0.0022
685	0.00352	0.00281	0.00273	0.00211	0.00273	0.0024	0.00535	0.00215
686	0.00339	0.0026	0.00256	0.00189	0.00252	0.00223	0.00518	0.00223
687	0.00334	0.00263	0.00247	0.00218	0.00247	0.00238	0.00496	0.00205
688	0.00366	0.00262	0.00246	0.00242	0.00246	0.00221	0.00516	0.002
689	0.00328	0.00282	0.00253	0.00212	0.00257	0.00257	0.0052	0.00212
690	0.00327	0.00273	0.00269	0.00228	0.00252	0.00232	0.00544	0.00203
691	0.00356	0.00277	0.00264	0.00194	0.0026	0.00223	0.00522	0.0021
692	0.00322	0.00267	0.00247	0.00197	0.00243	0.00226	0.00492	0.00209
693	0.00329	0.0025	0.00254	0.00213	0.00246	0.00229	0.00504	0.00213
694	0.0032	0.00245	0.00245	0.00216	0.00233	0.00224	0.00478	0.00212
695	0.00311	0.00261	0.00248	0.00211	0.0024	0.00224	0.00469	0.00219
696	0.00332	0.00253	0.00262	0.00212	0.00249	0.00237	0.00503	0.0022
697	0.00329	0.0025	0.00263	0.00213	0.00263	0.00217	0.00479	0.00209
698	0.00318	0.00263	0.00243	0.00214	0.00247	0.0023	0.00476	0.0023
699	0.00314	0.0026	0.00252	0.00223	0.00235	0.00256	0.00498	0.00219
700	0.00361	0.00244	0.01126	0.0024	0.00257	0.0024	0.00469	0.00224
