# Supplementary material for: The effects of humic substances on DNA isolation from soils
Source: PeerJ. 2020 Jul 24;8:e9378. doi: 10.7717/peerj.9378 (PMC7384437; doi:10.7717/peerj.9378)
Supplement: Supplemental Information 4 [file peerj-08-9378-s004.xlsx]

## Sheet: DNA
	direct isolation			humic acids - characteristics					spectral characteristics - humic acids					spectral characteristics - fulvic acids					humic acids - fluorescence								fulvic acids - fluorescence
No.	Conc. (ng/µl)	Eff. of isol. (µg/g)	C org %	C SH	CKH g/kg	CKF	CKH/CKF	CNE	Q250/465	Q280/465	Q465/665	ΔA1/ΔA2	Δlog K	Q250/465	Q280/465	Q465/665	ΔA1/ΔA2	Δlog K	HIX	BIX	f450/f500	A465	IF460/a460	IF310/a310	IF370/a370	IF245/a245	HIX	BIX	f450/f500	A465	IF460/a460	IF310/a310	IF370/a370	IF254/a254
1	25.5	0.16	2.622	11.72	10.3	1.42	7.25	14.5	7.08	5.96	4.36	1.46	0.68	16.82	12.44	5.69	1.82	0.89	3.36	0.88	1.2	421	5.69	7.87	6.52	3.26	7.3	0.88	1.64	433	2.1	7.55	6.23	3.96
2	61.3	0.32	1.12	3.71	2.8	0.91	3.08	7.49	7.94	6.85	5.46	1.53	0.76	17.35	12.57	5.46	2.06	0.87	4.85	0.54	1.22	501	7.11	8.43	7.52	3.46	8.51	0.46	1.63	356	2.37	9.99	7.69	5.81
3	11.7	0.13	1.092	10.99	9.67	1.3	7.45	0.12	7.65	6.47	4.82	1.56	0.7	17.63	12.98	7.1	1.83	0.97	4.72	0.34	1.23	385	5.66	7.91	6.44	3.47	9.52	0.54	1.64	392	1.92	8.42	6.34	4.38
4	216.5	0.17	0.769	7.01	5.99	1.02	5.87	0.69	6.68	5.6	4.7	1.56	0.67	24.3	16.92	5	2.12	0.95	6.95	0.59	1.15	644	7.54	9.3	7.29	3.6	9.19	0.49	1.75	372	3.36	15.93	12.02	8.18
5	46.8	0.34	2.011	16.89	14.97	1.92	7.8	3.22	7.38	5.92	5.03	1.75	0.67	19.88	14.26	7.19	1.8	1.01	5.8	0.59	1.16	530	6.79	10.37	7.84	4.02	9	0.5	1.64	370	1.84	9.75	6.39	4.72
6	32.5	0.35	2.919	29.81	27.32	2.49	10.97	1.69	7.77	6.29	5.09	1.62	0.7	20.21	14.36	7.16	1.72	1.04	5.66	0.56	1.19	515	8.24	11.9	9.12	5.23	8.36	0.4	1.6	381	2.11	9.55	6.26	5.16
7	200.8	1.05	4.036	37.36	34.66	2.7	12.84	2.99	6.88	5.76	4.05	1.44	0.65	12.88	9.75	5.65	1.56	0.84	9.74	0.58	1.12	367	4.47	5.97	5.01	2.4	10	0.41	1.61	456	1.39	5.54	4.18	3.03
8	30.1	0.28	0.934	4.27	3.36	0.91	3.69	5.07	9.03	7.73	5.41	1.53	0.8	19.48	14.03	4.98	1.82	0.94	4.36	0.54	1.28	438	8.42	10.24	9.35	4.24	7.87	0.57	1.69	297	3.37	14.09	11.15	8.53
